# Supplementary material for: Bio-inspired engineering of Bi2S3–PPy composite for the efficient electrocatalytic reduction of carbon dioxide
Source: Royal Society of Chemistry journal article supplement (doi:10.1039/d3ee02029k), 2023-01-01
Supplement: d3ee02029k1.pdf [file d3ee02029k1.pdf]

## Supporting Information

### **Bio-inspired engineering of Bi<sub>2</sub>S<sub>3</sub>-PPy composite for efficient electrocatalytic reduction of carbon dioxide**

Chengjin Li<sup>a</sup>, Zhengzheng Liu<sup>c</sup>, Xiaoxia Zhou<sup>a,\*</sup>, Lifang Zhang<sup>a</sup>, Zhengqian Fu<sup>a</sup>, Yiji Wu<sup>a</sup>, XiMeng Lv<sup>c</sup>, Gengfeng Zheng<sup>c\*</sup>, Hangrong Chen<sup>a,b\*</sup>

<sup>a</sup>State Key Laboratory of High Performance Ceramics and Superfine Microstructure, Shanghai Institute of Ceramics, Chinese Academy of Science, 1295 DingXi Road, Shanghai 200050, China.

<sup>b</sup>School of Chemistry and Materials Science, Hangzhou Institute for Advanced Study, University of Chinese Academy of Sciences, 1 Sub-lane Xiangshan, Hangzhou 310024, China.

<sup>c</sup>Laboratory of Advanced Materials, Department of Chemistry and Shanghai Key Laboratory of Molecular Catalysis and Innovative Materials Faculty of Chemistry and Materials Science, Fudan University, Shanghai 200438, China.

\* E-mail: zhouxiaoxia@mail.sic.ac.cn;  
gfzheng@fudan.edu.cn;  
hrchen@mail.sic.ac.cn;

## ***Experimental Details***

### **Chemicals and materials.**

Bismuth nitrate pentahydrate ( $\text{Bi}(\text{NO}_3)_3 \cdot 5\text{H}_2\text{O}$ ,  $\geq 99\%$ ), Thiourea ( $\text{CH}_4\text{N}_2\text{S}$ ,  $\geq 99\%$ ), Polyvinylpyrrolidone ( $(\text{C}_6\text{H}_9\text{NO})_n$ , K30), acetone (99.7%),  $\text{KHCO}_3$  (99.9%),  $\text{KOH}$  (99.9%), Pyrrole (99%),  $\text{FeCl}_3 \cdot 6\text{H}_2\text{O}$  (99%), commercial  $\text{Bi}_2\text{S}_3$  (99.9%),  $\text{RuO}_2$  (99.9%), and  $\text{IrO}_2$  (99.9%) were all purchased from Aladdin Co. Ltd. (Shanghai, China), ethanol ( $\text{C}_2\text{H}_5\text{OH}$ ,  $\geq 97\%$ ) was purchased from Sinopharm Chemical Reagent Co. Ltd. (Shanghai, China). The Nafion solution (Dupont, D-520 dispersion, 5% w/w in water, and 1-propanol) was purchased from Alfa Aesar. The gas diffusion layer was purchased from Fuel Cell Store. Hydroxide exchange membranes FAB-PK-130 were purchased from Fumatech.  $\text{CO}_2$  gas (99.99%), Ar gas (99.99%), and all the standard gases for gas chromatography were purchased from Shanghai Tomoe Gas Company. All the chemicals were used without further purification. Ultrapure Millipore water (18.2 M $\Omega$ ) was used in all experiments.

### **Synthesis of $\text{Bi}_2\text{S}_3$ urchin-like assembly.**

In a typical synthesis, PVP (0.5 g) and thiourea (0.3 g) were dispersed in 60 mL of EG under continuous stirring at 65 °C. Then, to this suspension, 10 mL of 0.1 M  $\text{Bi}(\text{NO}_3)_3$  solution (in ethylene glycol) was added dropwise. After 30 min of further stirring, the mixed suspension was transferred to a Teflon-lined autoclave and kept at 140 °C for 8 h. The resultant black precipitate was collected by centrifugation, washed thoroughly with deionized water and ethanol, and dried in a vacuum at 60 °C overnight.  $\text{Bi}_2\text{S}_3$ -PPy without the addition of PVP was synthesized with the same procedure as that of urchin-like  $\text{Bi}_2\text{S}_3$  except without adding PVP.

### **Synthesis of $\text{Bi}_2\text{S}_3$ -PPy composite.**

The resulting  $\text{Bi}_2\text{S}_3$  power (0.15 g) was immersed in  $\text{FeCl}_3$  aqueous solution (0.2 mL, 0.1 M) and dried in a vacuum. The dry powder and pyrrole monomer (2 mL) were separately placed in two vials, which were then sealed in a bottle filled with argon and kept at 40 °C for 3 h. The  $\text{Bi}_2\text{S}_3$ -PPy-1 h and  $\text{Bi}_2\text{S}_3$ -PPy-5 h were formed by adjusting reaction time 1 h and 5 h, respectively. In addition, the com- $\text{Bi}_2\text{S}_3$ -PPy and  $\text{Bi}_2\text{S}_3$ -PPy

without the addition of PVP were synthesized with the same procedure as that of Bi<sub>2</sub>S<sub>3</sub>-PPy.

#### **Preparation of working electrodes.**

The substrate electrode was fabricated by carbon paper (1 x 0.5 cm), which was sonicated in hydrochloric acid (1.0 M), acetone, and deionized water for 30 min, respectively. Typically, power catalysts (10 mg) and carbon black (5 mg) were dispersed in Nafion perfluorinated resin solution (5%, 50  $\mu$ L), ethanol (500  $\mu$ L), and deionized water (500  $\mu$ L) by ultrasonication for 30 min to form homogeneous catalysts ink. Then the as-prepared catalyst ink was onto the carbon paper several times with a pipette (100  $\mu$ L), using 30  $\mu$ L for each electrode. Finally, the obtained composite electrodes were dried at room temperature for 12 h.

#### **Electrochemical measurements.**

All the electrochemical experiments were performed in a gas-tight H-cell containing 30 mL of electrolyte, which was separated by a proton exchange membrane (Nafion N115). The Ag/AgCl (saturated KCl) and Pt plate (1.5 x 1.5 cm<sup>2</sup>) were used as the reference and counter electrodes, respectively. Electrochemical data were recorded on a Biologic electrochemical workstation. Before each experiment, CO<sub>2</sub> (99.999%) was continuously bubbled into the electrolyte for 30 mins to eliminate O<sub>2</sub> and saturate the electrolyte with CO<sub>2</sub>. The electrochemical experiments were measured at room temperature (25  $\pm$  3  $^{\circ}$ C), and all potentials reported in this paper are referenced to a reversible hydrogen electrode (RHE,  $E_{\text{RHE}} = E_{\text{Ag/AgCl}} + 0.197 + 0.0591 \times \text{pH}$ ). The pH of the Ar/CO<sub>2</sub>-saturated 0.5 M KHCO<sub>3</sub> electrolyte is 8.56 and 7.33 in this study.

#### **Products analysis.**

The gaseous products of CO<sub>2</sub> electrocatalytic reduction were monitored by gas chromatography (GC) (Thermo Scientific Trace 1300) equipped with thermal conductivity (TCD) and flame ionization detector (FID). Quantification of the products was performed by an external standard method.

CO and H<sub>2</sub> Faradaic efficiency (FE) can be computed as:

$$\text{FE} = \frac{Fn\alpha}{Q}$$

Where  $F$  is the Faraday constant,  $\alpha = 2$  is the number of electrons involved in the electrode reaction,  $n$  is the amount of  $\text{CO} \cdot \text{H}_2$  produced, and  $Q$  is the total charge consumed during the whole electrolysis.

The  $\text{KHCO}_3$  solution after electrolysis was collected and analyzed on a Bruker Ascend 500 MHz NMR spectrometer to quantify liquid products. The quantification of the liquid products was obtained as follows. The molar quantity of formate ( $N_{\text{formate}}$ ) was measured via the internal standard method of  $^1\text{H}$  NMR. Typically, 10 mL of electrolyte was mixed with 50  $\mu\text{L}$  of 50 mM DMSO solution by mixing 250  $\mu\text{L}$  above solution with 350  $\mu\text{L}$   $\text{D}_2\text{O}$ . The  $^1\text{H}$  NMR spectrum was measured with water suppression via a pre-saturation method. The area ratio of the formate peak to the DMSO peak was compared to the standard curve to quantify the concentration of formate. The  $N_{\text{formate}}$  was calculated by multiplying the concentration of formate with the volume of electrolyte in the cathode.

$$\text{FE} = \frac{\alpha n F}{Q}$$

Where  $\alpha$  is the electron transferred to produce formate ( $\alpha = 2$ ),  $n$  is the amount of formate produced,  $F$  is the Faradaic constant, and  $Q$  is the total charge consumed during the whole electrolysis.

The energy efficiency for the conversion of  $\text{CO}_2$  into formate was calculated by the following equation.

$$\Phi_{\text{formate}} = \frac{FE * \Delta E_{\text{formate}}^0}{\Delta E_{\text{formate}}}$$

$\Phi_{\text{formate}}$  was the energy efficiency for the conversion of  $\text{CO}_2$  into formate.  $\Delta E_{\text{formate}}^0$  was the difference between the standard half reaction potentials for water oxidation (1.23 V vs. RHE) and the reduction of  $\text{CO}_2$  into formate (-0.2 V vs. RHE).  $\Delta E_{\text{formate}}$  was the difference between the standard water oxidation potential and the working potential at the cathode, respectively.

Linear sweep voltammetry (LSV) was carried out in  $\text{CO}_2$ -saturated or Ar-saturated 0.5 M  $\text{KHCO}_3$  electrolyte with a scan rate of 50  $\text{mV s}^{-1}$ . The cyclic voltammetry

measurement was conducted in CO<sub>2</sub>-saturated 0.5 M KHCO<sub>3</sub> solution using a three-electrode cell equipped with an Ag/AgCl reference electrode and a Pt foil counter electrode at 25 °C. Electrochemical impedance spectroscopy (EIS) was recorded at -0.9 V vs. RHE in CO<sub>2</sub>-saturated 0.5 M KHCO<sub>3</sub> electrolyte with an amplitude of 5 mV, and the frequency range is from 0.1 Hz to 1000000 Hz. The Tafel plot (overpotential versus log  $j_{\text{formate}}$ ) was derived from the controlled potential electrolysis results. Double-layer capacitance ( $C_{dl}$ ) was determined by measuring the capacitive current associated with double-layer charging from the scan-rate dependence of cyclic voltammogram (CV). The CV range from -0.1 V to 0 V vs. RHE. The  $C_{dl}$  was estimated by plotting the  $\Delta j$  ( $\Delta j = j_a - j_c$ ) at -0.05 V vs. RHE against the scan rates, in which the  $j_a$  and  $j_c$  were the anodic and cathodic current densities, respectively. Electroreduction of CO<sub>2</sub> was investigated for 20 C at each applied potential by the controlled potential electrolysis method. Before each new electrocatalyst test, 100 cycles of cyclic voltammetry (CV) were used to activate the electrodes.

#### **Flow cell measurements.**

**Preparation of electrode.** For flow-cell CO<sub>2</sub> electrolysis, gas-diffusion-electrodes (GDEs) were prepared via drop-casting catalysts onto a gas-diffusion-layer (GDL, Freudenberg). To prepare the cathode electrode, a well-dispersed catalyst slurry comprising 3 mg of catalyst, 0.5 mL of acetone, and 20  $\mu$ L of Nafion ionomer solution was mixed. Next, the catalyst slurry was slowly drop-casted onto a GDL to attain a catalyst loading of  $\sim 1 \text{ mg cm}^{-2}$ . A similar procedure was used for RuO<sub>2</sub>/IrO<sub>2</sub> nanoparticles (99% metal basis, Macklin) to prepare the anode electrode.

**Electrochemical analysis of CO<sub>2</sub> reduction.** For CO<sub>2</sub> electroreduction (CO<sub>2</sub>RR) in flow-cell, the electrochemical tests were conducted using a 1-cm<sup>2</sup> flow cell on a CHI 750E electrochemical workstation at room temperature ( $25 \pm 1 \text{ }^\circ\text{C}$ ). The flow cell configuration consisted of a catalyst-sprayed GDE as the working electrode, an IrO<sub>2</sub>-sprayed GDE as the anode, and an anion exchange membrane (Fumatech FAB-PK-130) to separate the cathode and anode chambers. All applied potentials were converted to the RHE scale according to the Nernst equation:

$$E_{\text{RHE}}(\text{V}) = E_{\text{Ag/AgCl}}(\text{V}) + 0.197 \text{ V} + 0.059 \times \text{pH}$$

The reaction was performed in 1 M KOH as the electrolyte with a steady stream of CO<sub>2</sub> (30 s.c.c.m). The gas product was collected and analyzed by gas chromatography (Shanghai Ramiin GC 2060) and liquid products were quantified by <sup>1</sup>H nuclear magnetic resonance (NMR) spectroscopy (Bruker AVANCEAV III HD 500) and the pre-saturation method was used to suppress water peak.

The CO<sub>2</sub>-OER electrolysis was carried out in a two-electrode system. The Bi<sub>2</sub>S<sub>3</sub>-PPy and commercial RuO<sub>2</sub> served as CO<sub>2</sub>RR catalyst and OER catalyst, respectively. And the 0.5 M KHCO<sub>3</sub> and 1M KOH respectively served as the catholyte and anolyte, separated by a bipolar membrane. Other test conditions were similar to the CO<sub>2</sub>RR process in an H-type electrolyzer.

### **Zn-CO<sub>2</sub> measurements**

The Zn-CO<sub>2</sub> batteries applied H-cell configurations. The gas diffusion layer loading Bi<sub>2</sub>S<sub>3</sub>-PPy and Zn plate served as battery electrodes. The 2 M KHCO<sub>3</sub> + 0.02 M HCOOH and 2 M KOH + 0.02 M Zn(AC)<sub>2</sub> served as electrolytes, which were separated by a bipolar membrane.

The cathodic and anodic reactions of the aqueous rechargeable Zn-CO<sub>2</sub> battery during the charge and discharge processes.

1) When the aqueous Zn-CO<sub>2</sub> battery discharge, the following reactions are assumed to take place:

Cathode (CO<sub>2</sub>-saturated 0.5 M KCO<sub>3</sub>, pH = 7.3)

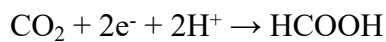

Anode (0.8 M KOH with 0.02 M Zn(CH<sub>3</sub>COO)<sub>2</sub>)

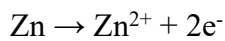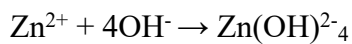

Overall discharge reaction:

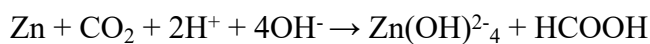

2) When aqueous Zn-CO<sub>2</sub> battery discharge, the following reactions are assumed to take place:

Cathode:

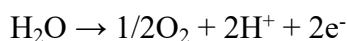

Anode:

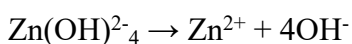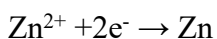

Overall charge reaction:

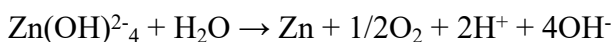

*In situ* electrochemical Raman measurements were performed by a tailor-made flow cell. A peristaltic pump was used to pump 0.5 M KHCO<sub>3</sub> electrolyte at a constant flow rate of 3 mL min<sup>-1</sup> over the Bi<sub>2</sub>S<sub>3</sub>-PPy supported GDL electrode. CO<sub>2</sub> gas was introduced to the back of GDL in a gas chamber at a flow rate of 10 s.c.c.m. During *in situ* Raman measurements, the Raman spectra were recorded against the applied potential range of -0.1 to -1.5 V vs. RHE at a Renishaw Via Raman spectrometer ( $\lambda = 633$  nm).

*In situ* ATR-IR measurements were conducted by a Nicolet 6700 infrared spectrometer equipped with a liquid nitrogen-cooled MCT detector. The spectral resolution was set to 4.0 cm<sup>-1</sup>, and a total of 64 interferograms were added to each spectrum. The spectrum was given in absorbance units defined as  $\text{Abs} = -\lg(R/R_0)$ , where R and R<sub>0</sub> represent the reflected *in-situ* ATR-IR intensities, corresponding to the single beam spectra of the sample and reference, respectively. The electrocatalyst was dropped on the 6 mm glassy carbon electrode and used as the working electrode for the *in-situ* ATR-IR test with a loading amount of 0.1 mg cm<sup>-2</sup>. In all tests, the Pt electrode and Ag/AgCl electrode were used as counter electrode and reference electrode, respectively. The 0.5 M KHCO<sub>3</sub> solution saturated with CO<sub>2</sub> was used as the electrolyte. In this experiment, the chronopotentiometry test was used at different potentials without *in-situ* ATR-IR correction. The potential was set from open potential to -1.2 V vs. RHE, which was collected during the test. The electric potential of the reference single beam spectrum was open potential.

### **Physical characterizations.**

Scanning electron microscopy (SEM) images were taken using the Magellan 400 high-resolution electron microscope. Transmission electron microscopy (TEM) was performed on a JEM-1400 transmission electron microscopy operated at 120 kV

accelerating voltage. High-resolution TEM (HRTEM) and high-angle annular dark-field scanning transmission electron microscopy (HAADF-STEM) images and elemental mappings were collected by the Tecnai G2 F20 field-emission transmission electron microscope. Fourier transforms (FT)-IR spectra were performed on the FT-IR spectrometer (Bruker Alpha II) with a KBr disk containing the catalysts powder. X-Ray diffraction (XRD) patterns were recorded on a Bruker D2 Phaser X-Ray powder Diffractometer with (Cu K $\alpha$  radiation,  $\lambda = 0.154$  nm). X-ray photoelectron spectroscopy (XPS) was recorded on the ESCALab250 spectrometer. All the binding energy corresponds to the standard C1s peak at 284.8 eV in this experiment. Raman spectra were collected by a Renishaw in Via Raman microscope with a REM Laser at a wavelength of 532 nm. CO<sub>2</sub> adsorption isotherms were determined by Micromeritics ASAP 2020M at 25 °C, and before the CO<sub>2</sub> adsorption experiment, two cycles of gas desorption were performed. The contact angle was measured by a contact-angle system (Biolin Scientific, Finland). TPD profiles of the samples were recorded by an AutoChem 2920 chemisorption analyzer with a TCD. Ultraviolet photoelectron spectroscopy (UPS) tests with photo energy of 21.22 eV were performed at EscaLab 250xi. The work functions of Bi<sub>2</sub>S<sub>3</sub>-PPy and Bi<sub>2</sub>S<sub>3</sub> were determined by the difference in the photo energy and the binding energy of the secondary cutoff edge.

#### **Density functional theory calculation details.**

All the calculations are performed in the framework of the density functional theory (DFT) with the projector augmented plane-wave method, as implemented in the Vienna ab initio simulation package.<sup>1</sup> The generalized gradient approximation proposed by Perdew, Burke, and Ernzerhof (PBE) is selected for the exchange-correlation potential.<sup>2</sup> The long-range van der Waals interaction is described by the DFT-D3 approach.<sup>3</sup> The cut-off energy for the plane wave is set to 400 eV. The energy criterion is set to 10<sup>-5</sup> eV in the iterative solution of the Kohn-Sham equation. A vacuum layer of 15 Å is added perpendicular to the sheet to avoid artificial interaction between periodic images. The Brillouin zone integration is performed using a 2 x 2 x 1 k-mesh. All the structures are relaxed until the residual forces on the atoms have declined to less than 0.03 eV/Å. The interface was constructed by



Bi<sub>2</sub>S<sub>3</sub> (211) and Bi (110), where the lattice matching was performed by the package of structures of alloy generation and recognition.<sup>4</sup> Several S atoms were removed to investigate the absorption ability effect of this interface. The Gibbs free energy is calculated as follows:  $\Delta G = E_{DFT} + E_{ZPE} - T\Delta S$ , where  $E_{DFT}$  is the total energy from DFT calculations,  $E_{ZPE}$  is zero-point energy to correct the molecular vibration effect, and  $T\Delta S$  is an entropic contribution to consider the thermal effect.

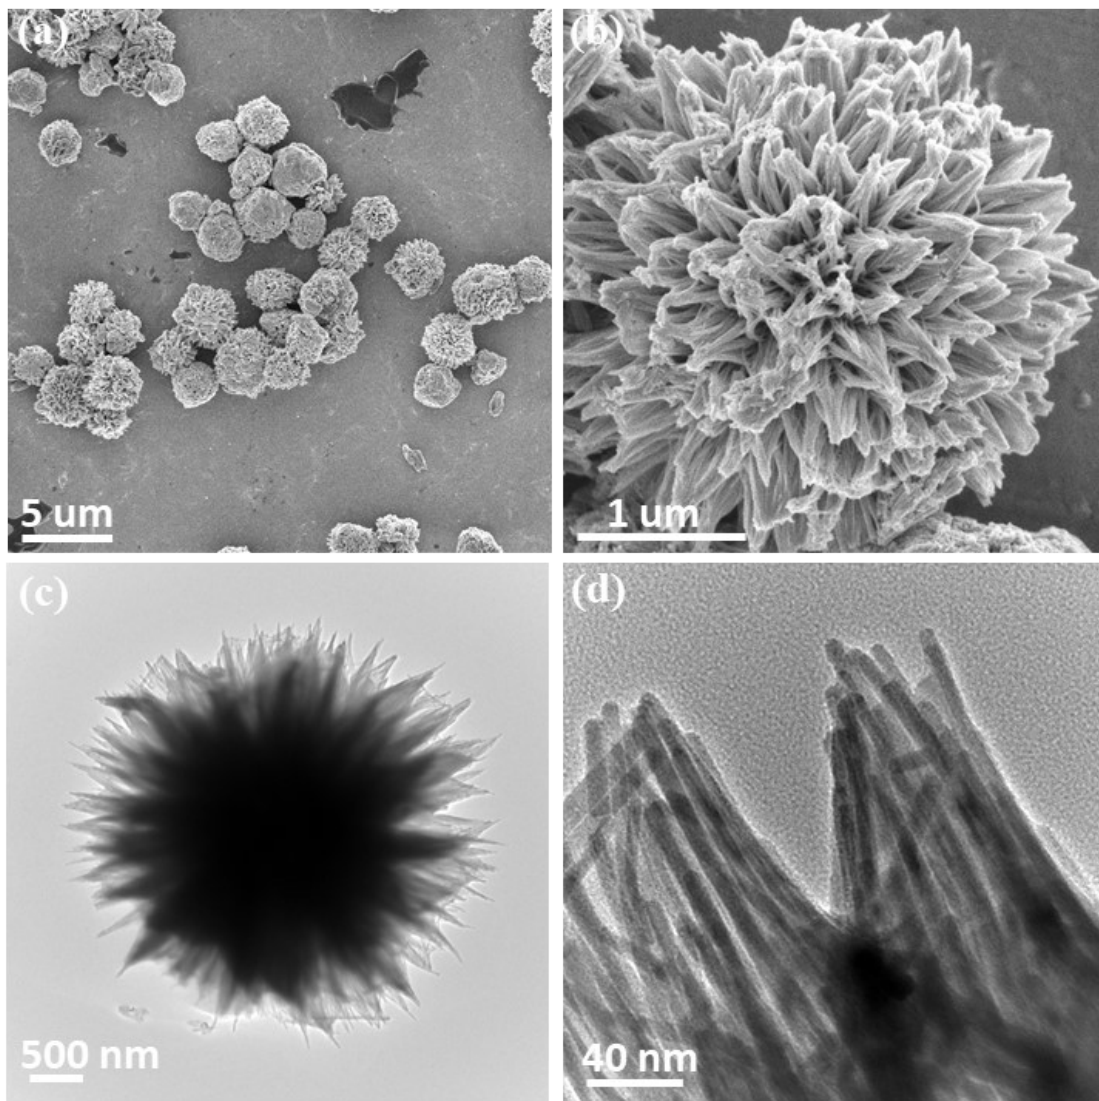

**Figure S1.** SEM images (a-b) and TEM images (c-d) of Bi<sub>2</sub>S<sub>3</sub> with PVP additive.

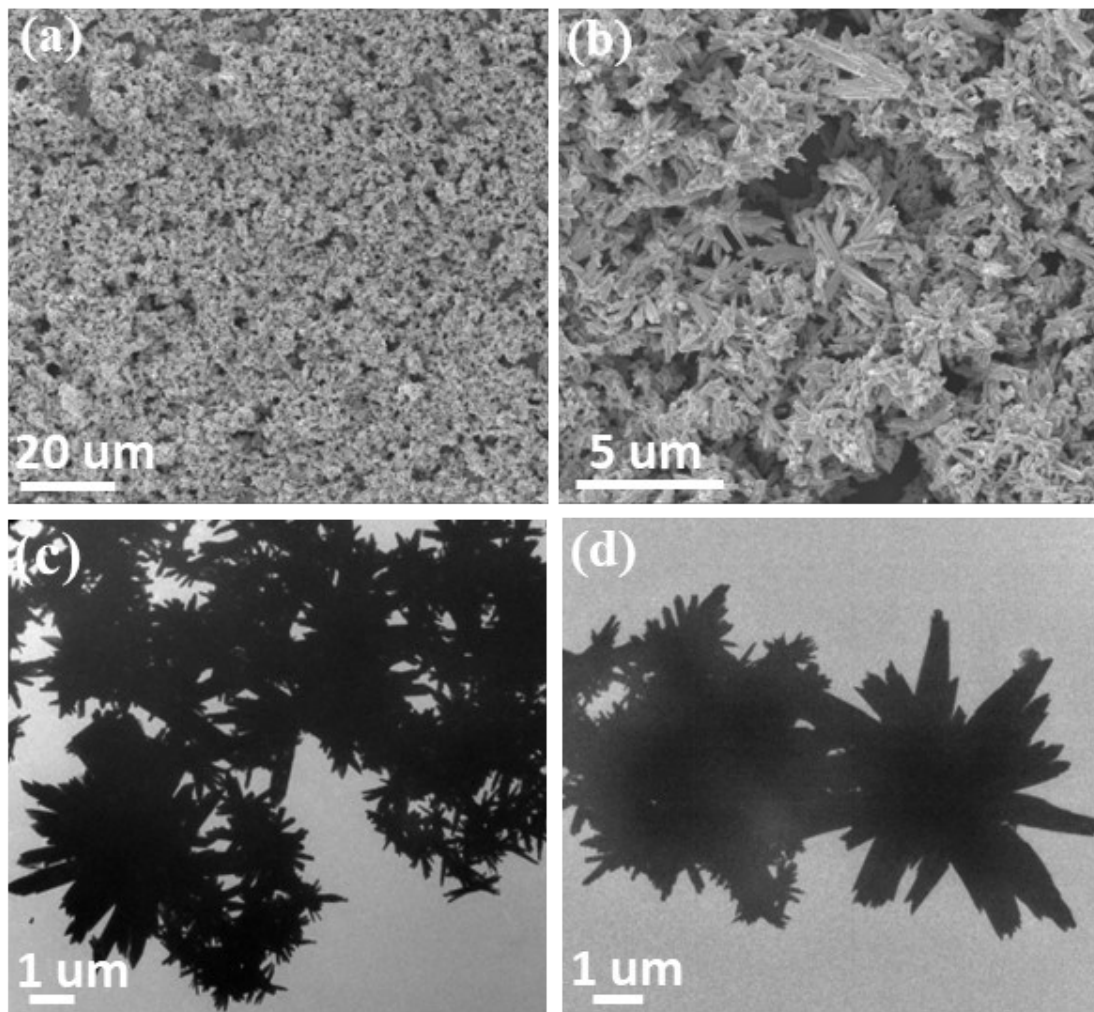

**Figure S2.** (a-b) Different magnification SEM images and (c-d) TEM images of  $\text{Bi}_2\text{S}_3$  samples without PVP additive.

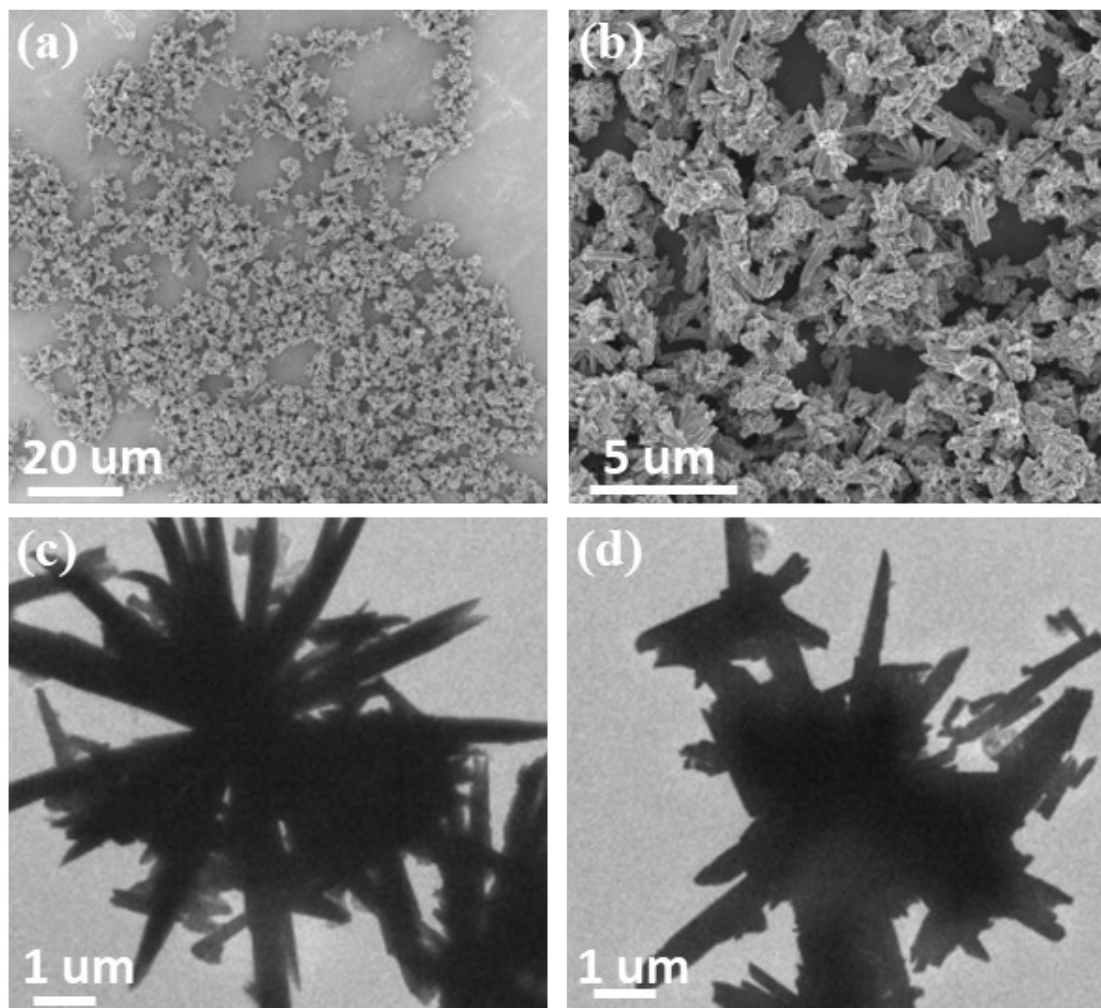

**Figure S3.** (a-b) Different magnification SEM images and (c-d) TEM images of  $\text{Bi}_2\text{S}_3$ -PPy sample without PVP additive.

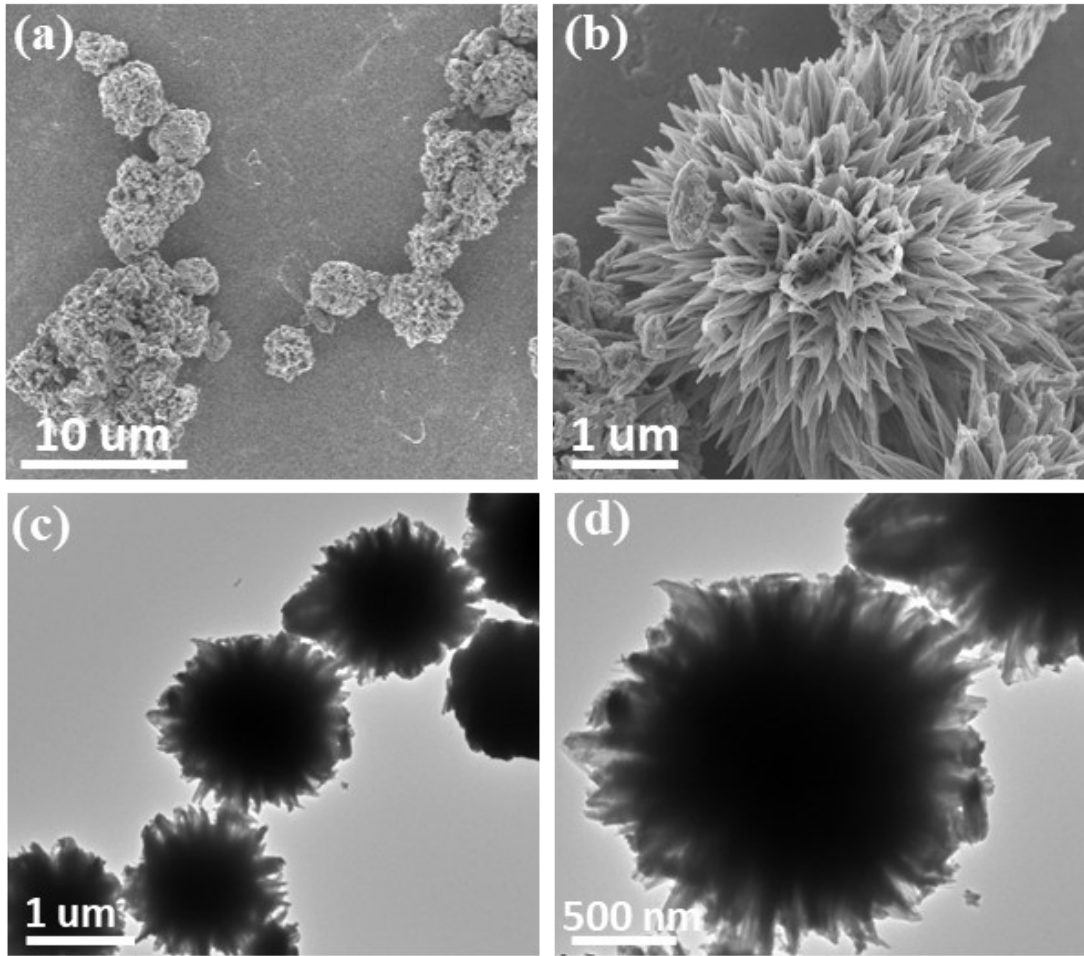

**Figure S4.** SEM images (a-b) and TEM images (c-d) of Bi<sub>2</sub>S<sub>3</sub>-PPy-1 h.

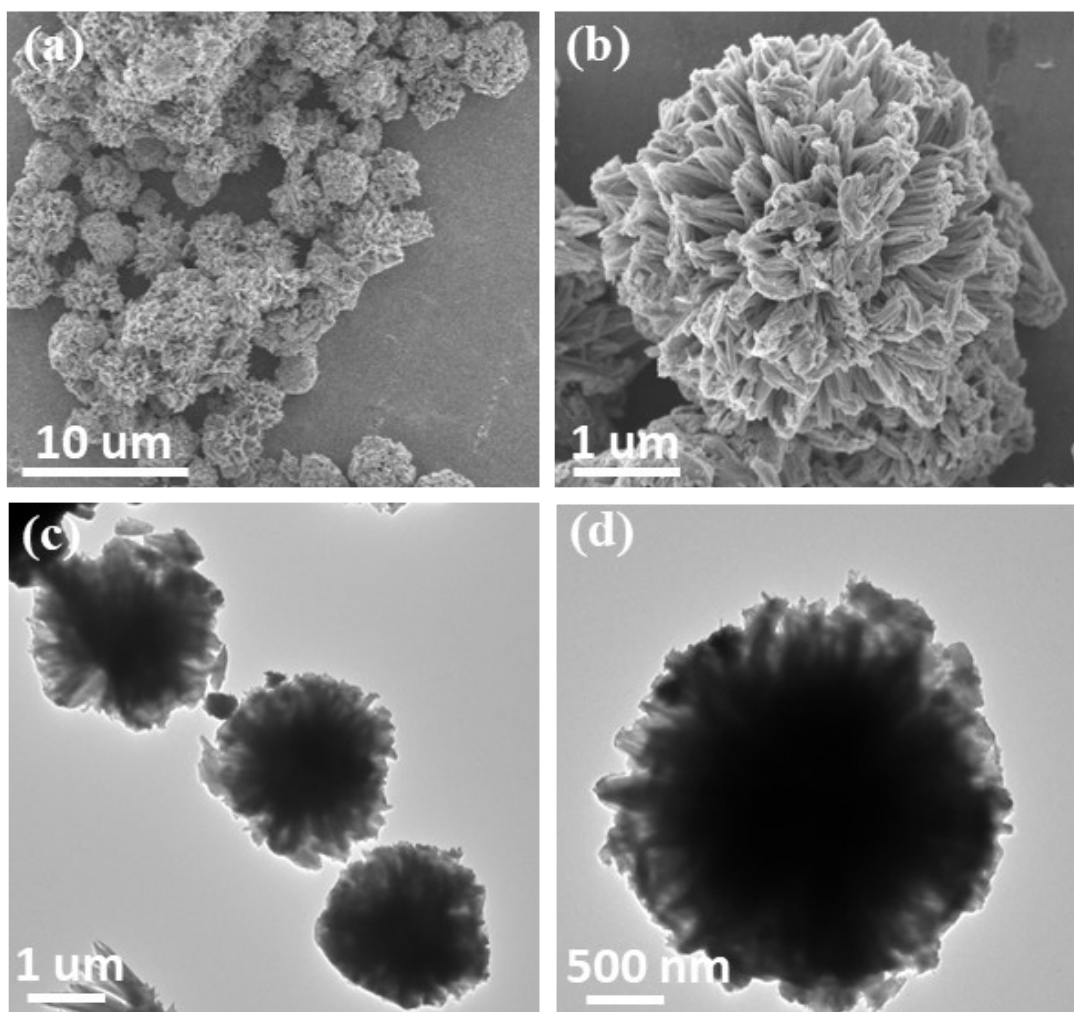

**Figure S5.** SEM images (a-b) and TEM images (c-d) of Bi<sub>2</sub>S<sub>3</sub>-PPy-5 h.

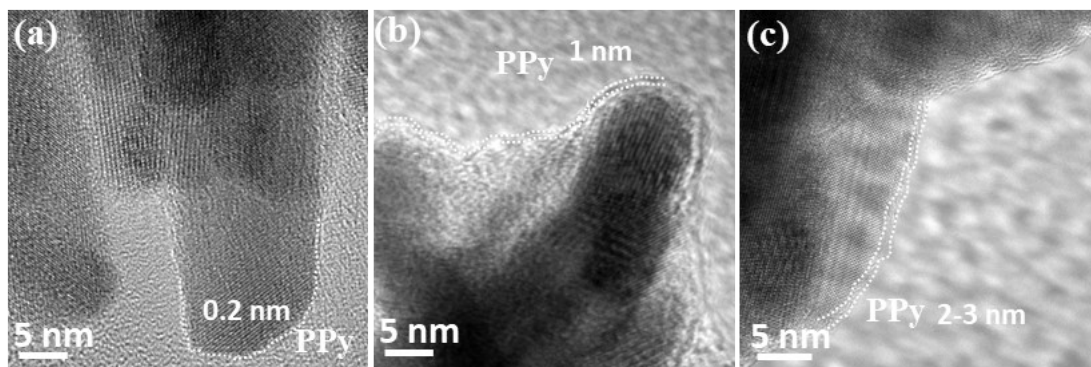

**Figure S6.** HRTEM images of (a)  $\text{Bi}_2\text{S}_3$ -PPy-1 h, (b)  $\text{Bi}_2\text{S}_3$ -PPy and (c)  $\text{Bi}_2\text{S}_3$ -PPy-5 h.

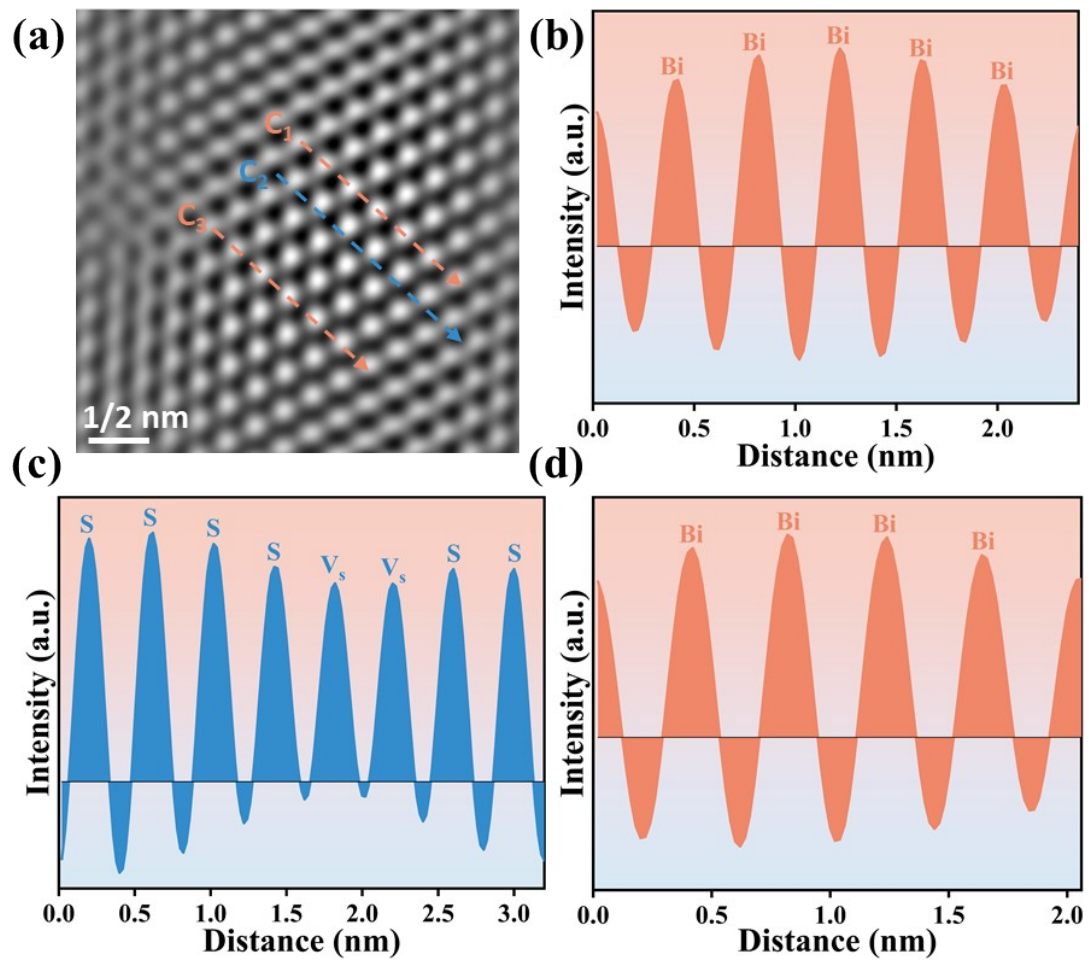

**Figure S7.** (a) Gaussian filter noise reduction image of the magnified HRTEM  $\text{Bi}_2\text{S}_3$  image, (b-d) Intensity profiles of the lattice fringe corresponding to the dotted arrow in (a).



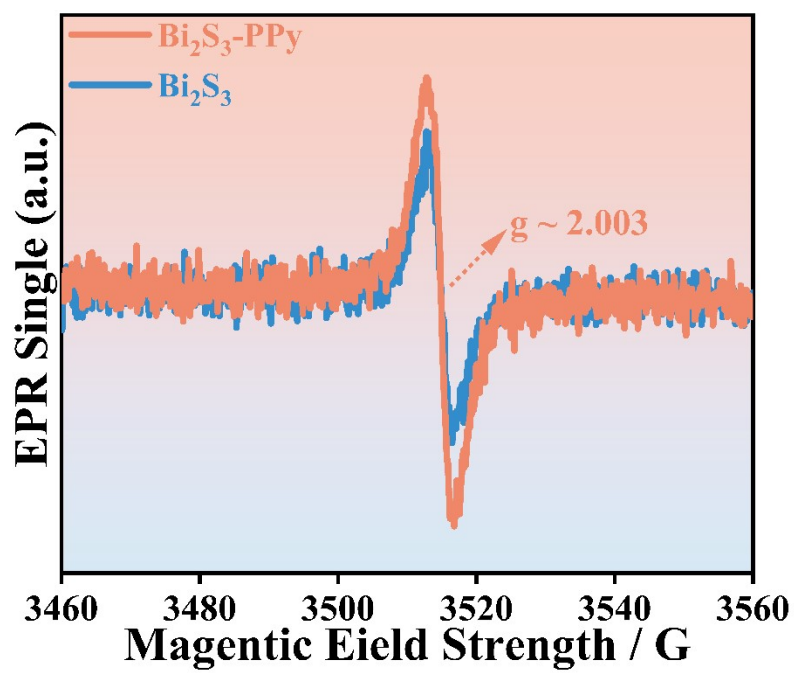

**Figure S8.** Electron paramagnetic resonances (EPR) spectra of  $\text{Bi}_2\text{S}_3\text{-PPy}$  and  $\text{Bi}_2\text{S}_3$ .

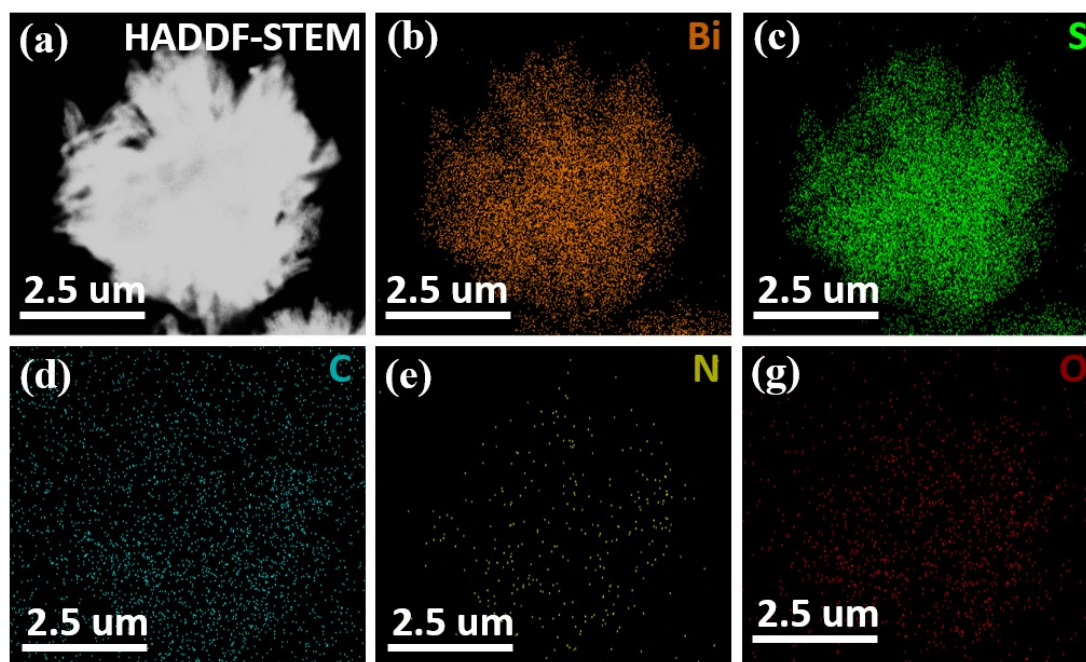

Figure S9. HRTEM images of HAAD-STEM elemental mappings of  $\text{Bi}_2\text{S}_3$ -PPy-1 h.

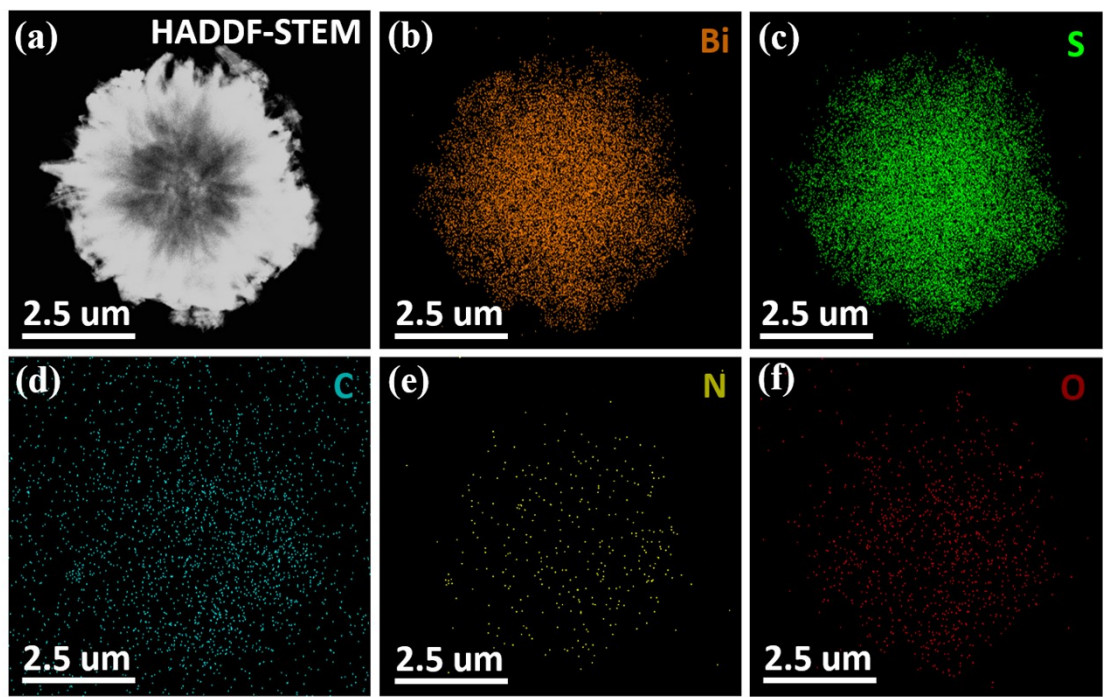

**Figure S10.** HRTEM images of HAAD-STEM elemental mappings of  $\text{Bi}_2\text{S}_3\text{-PPy-5 h}$ .

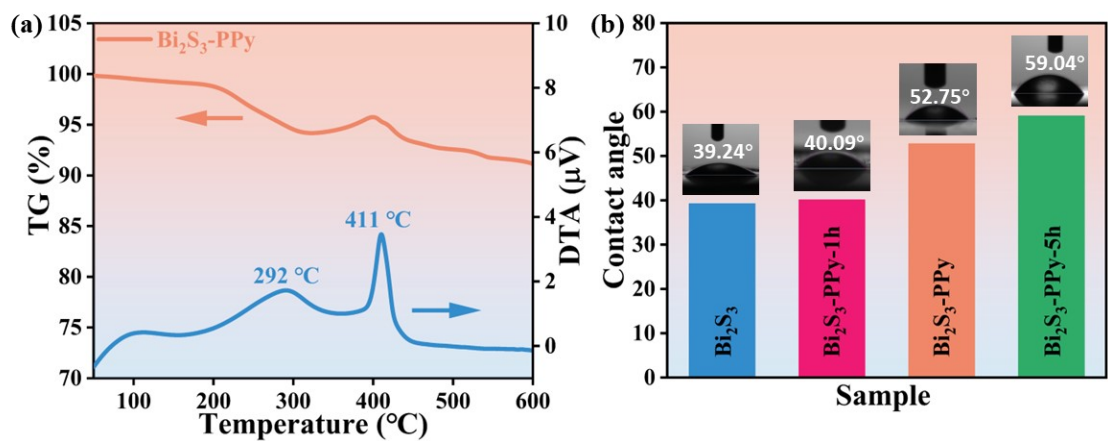

**Figure S11.** (a) TGA curves of  $\text{Bi}_2\text{S}_3\text{-PPy}$  in air. (b) The contact angle measurements of  $\text{Bi}_2\text{S}_3$ ,  $\text{Bi}_2\text{S}_3\text{-PPy-1 h}$ ,  $\text{Bi}_2\text{S}_3\text{-PPy}$ , and  $\text{Bi}_2\text{S}_3\text{-PPy-5 h}$ .

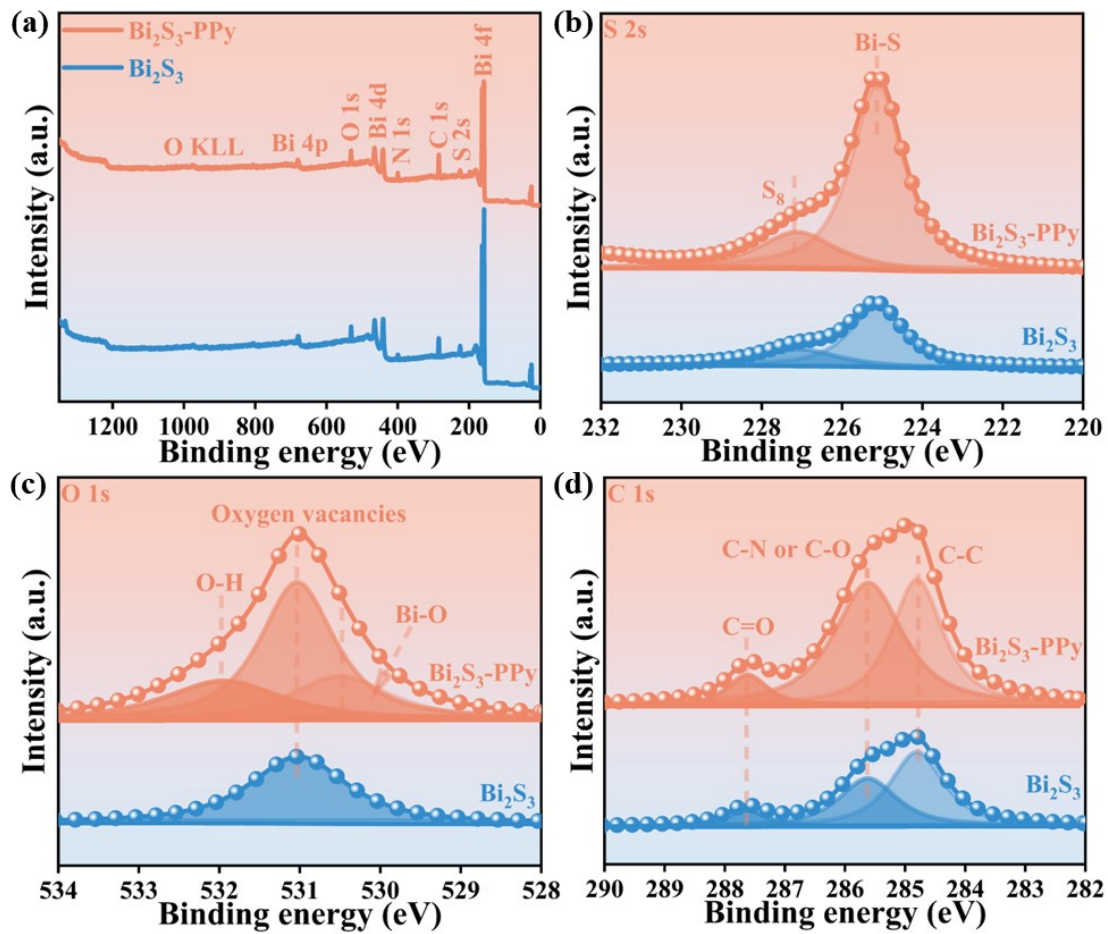

**Figure S12.** (a) XPS survey spectra, (b) S 2s, (c) O 1s, (d) C 1s XPS spectra of  $\text{Bi}_2\text{S}_3$  and  $\text{Bi}_2\text{S}_3\text{-PPy}$ .

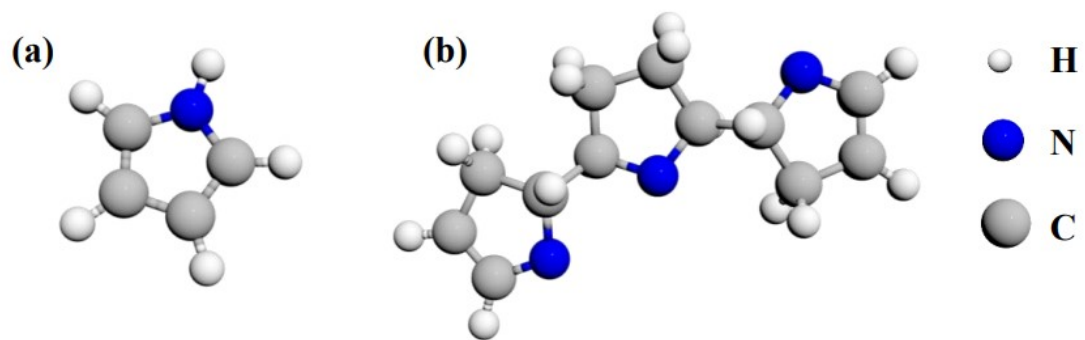

**Figure S13.** Models of (a) pyrrole and (b) PPy.

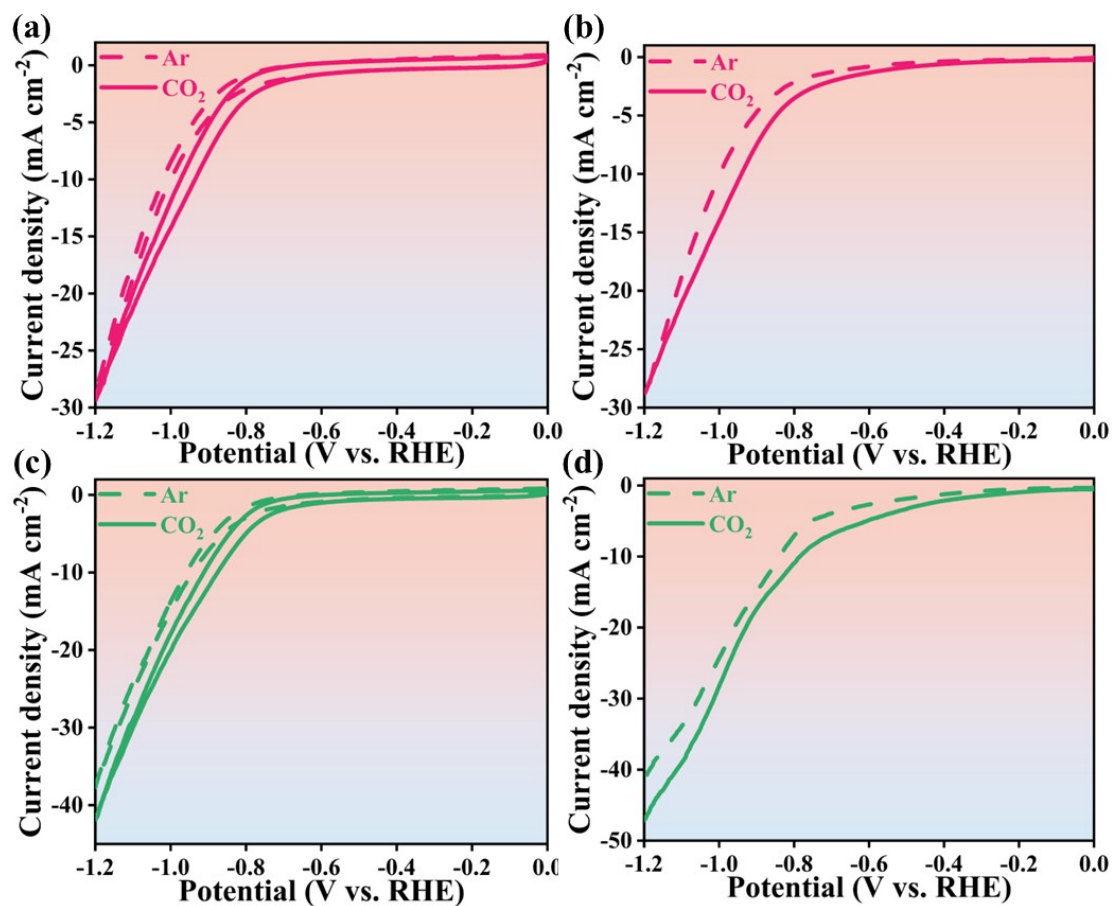

**Figure S14.** CV curves of (a) Bi<sub>2</sub>S<sub>3</sub>-PPy-1 h, (c) Bi<sub>2</sub>S<sub>3</sub>-PPy-5 h in 0.5 M KHCO<sub>3</sub> under CO<sub>2</sub> or Ar. LSV plots of (b) Bi<sub>2</sub>S<sub>3</sub>-PPy-1 h, (d) Bi<sub>2</sub>S<sub>3</sub>-PPy-5 h in 0.5 M KHCO<sub>3</sub> under CO<sub>2</sub> or Ar.

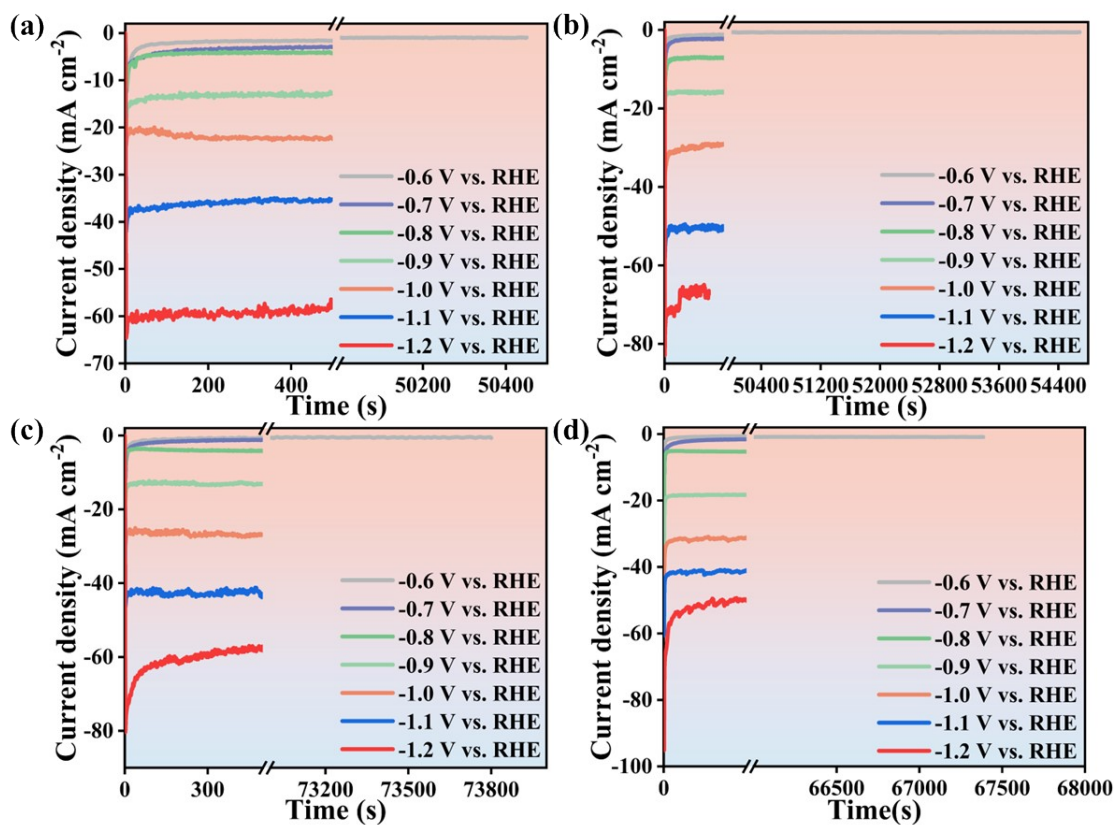

**Figure S15.** Chronoamperometry curves at various potentials in CO<sub>2</sub>-saturated 0.5 M KHCO<sub>3</sub> over (a) Bi<sub>2</sub>S<sub>3</sub>, (b) Bi<sub>2</sub>S<sub>3</sub>-PPy, (c) Bi<sub>2</sub>S<sub>3</sub>-PPy-1 h, and (d) Bi<sub>2</sub>S<sub>3</sub>-PPy-5 h.



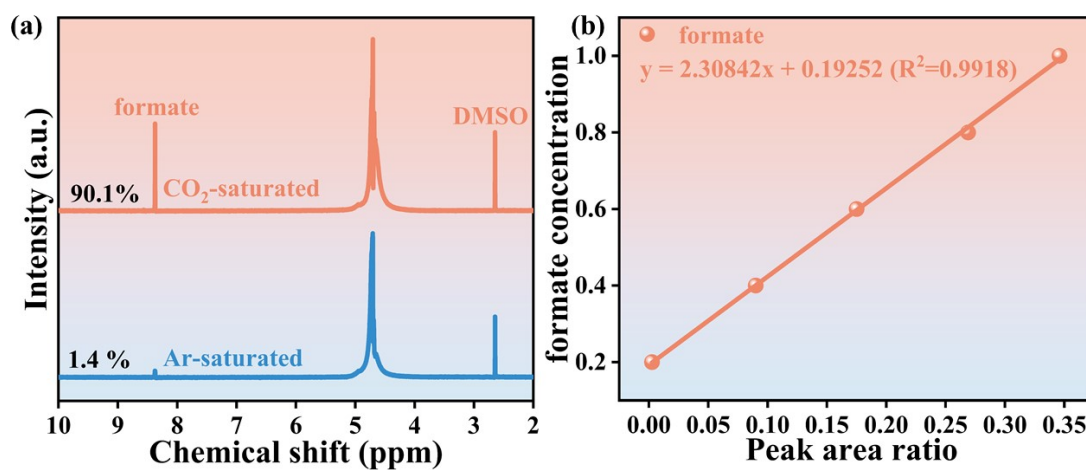

**Figure S16.** (a) Representative  $^1\text{H}$  NMR spectra of liquid products in  $\text{CO}_2$  or Ar-saturated 0.5 M  $\text{KHCO}_3$ . DMSO is used as an internal standard for the quantification of formate. (b) The calibration curve of formate was calculated from the  $^1\text{H}$  NMR integral area.

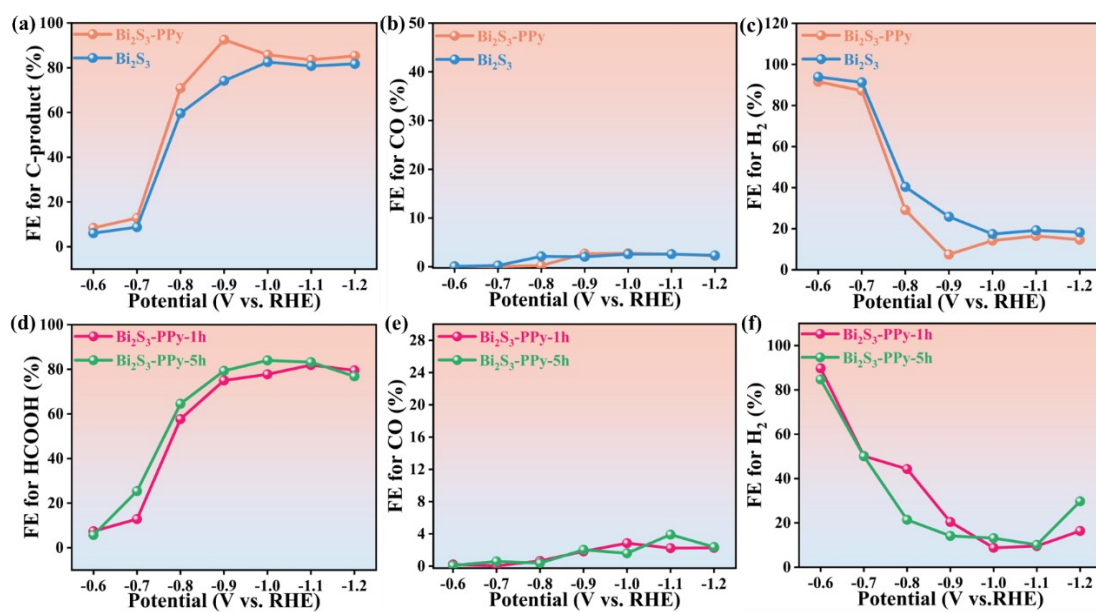

**Figure S17.** Faradaic efficiency of (a) C-product (CO and formate), (b) CO, and (c)  $\text{H}_2$  on  $\text{Bi}_2\text{S}_3$ -PPy and  $\text{Bi}_2\text{S}_3$ . (c) C-product (CO and formate), (d) CO, and (f)  $\text{H}_2$  on  $\text{Bi}_2\text{S}_3$ -PPy-1 h and  $\text{Bi}_2\text{S}_3$ -PPy-5 h.

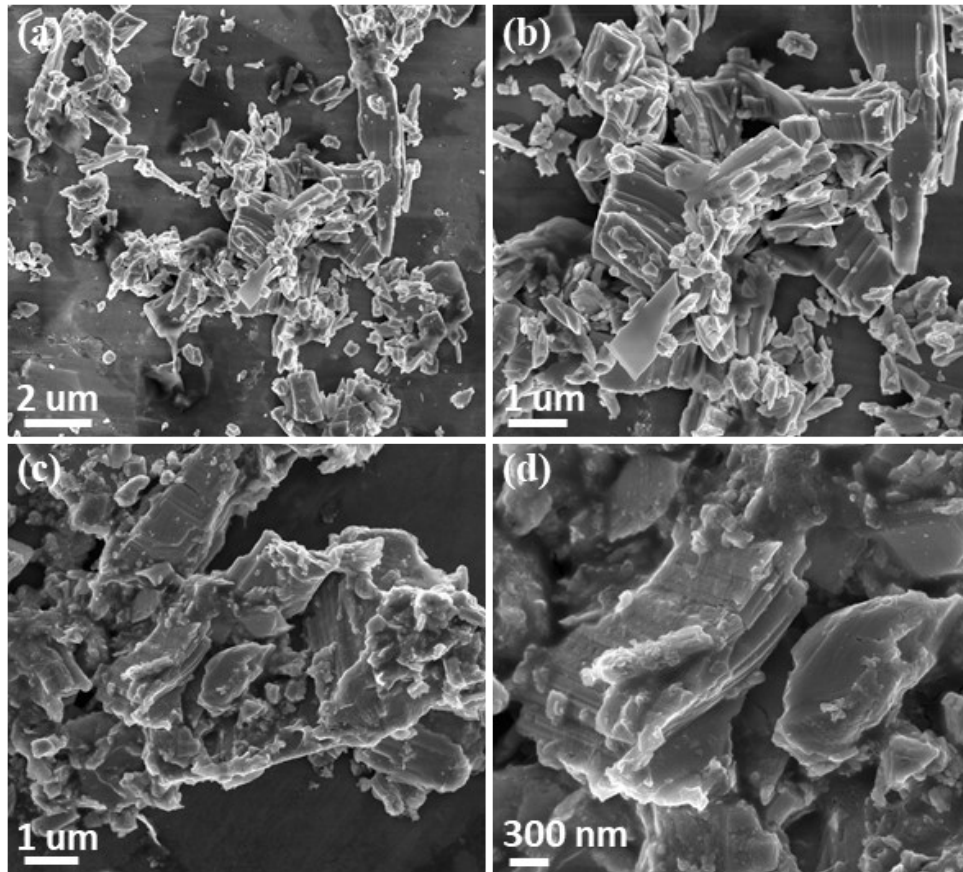

**Figure S18.** SEM images of (a-b) commercial  $\text{Bi}_2\text{S}_3$  nanoparticles (com- $\text{Bi}_2\text{S}_3$ ) and commercial  $\text{Bi}_2\text{S}_3$  coating PPy (com- $\text{Bi}_2\text{S}_3$ -PPy).

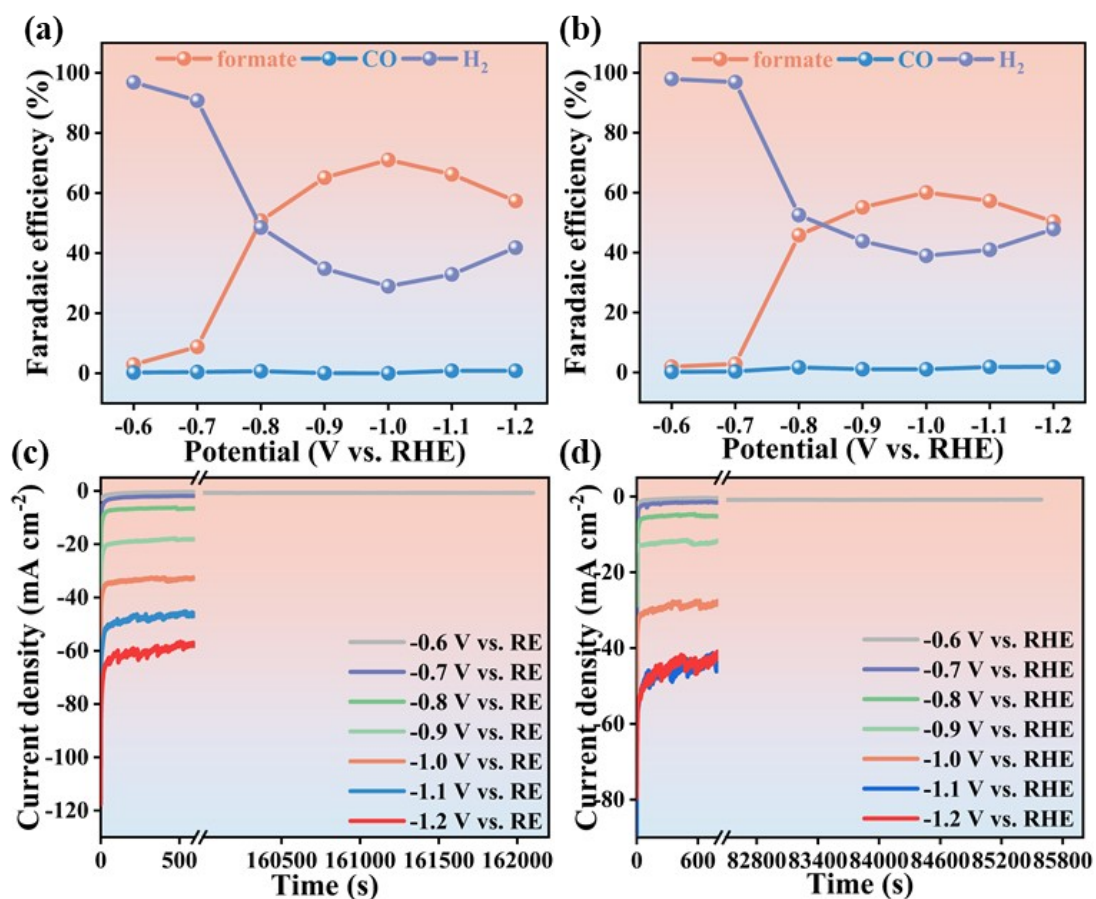

**Figure S19.** Potential-dependent Faradaic efficiencies of formate · CO and H<sub>2</sub> for (a) Bi<sub>2</sub>S<sub>3</sub>-PPy without the addition of PVP and (b) com-Bi<sub>2</sub>S<sub>3</sub>-PPy in CO<sub>2</sub>-saturated 0.5 M KHCO<sub>3</sub>. Potentiostatic curves of (c) Bi<sub>2</sub>S<sub>3</sub>-PPy without the addition of PVP and (d) com-Bi<sub>2</sub>S<sub>3</sub>-PPy at various potentials in H-cell.

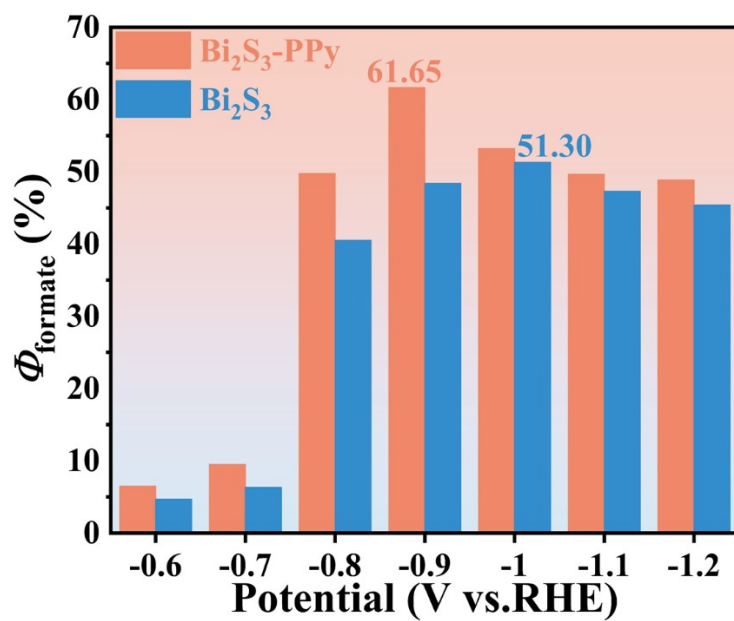

**Figure S20.** Energy conversion efficiencies for formate production ( $\Phi_{\text{formate}}$ ) over  $\text{Bi}_2\text{S}_3\text{-PPy}$  and  $\text{Bi}_2\text{S}_3$ .

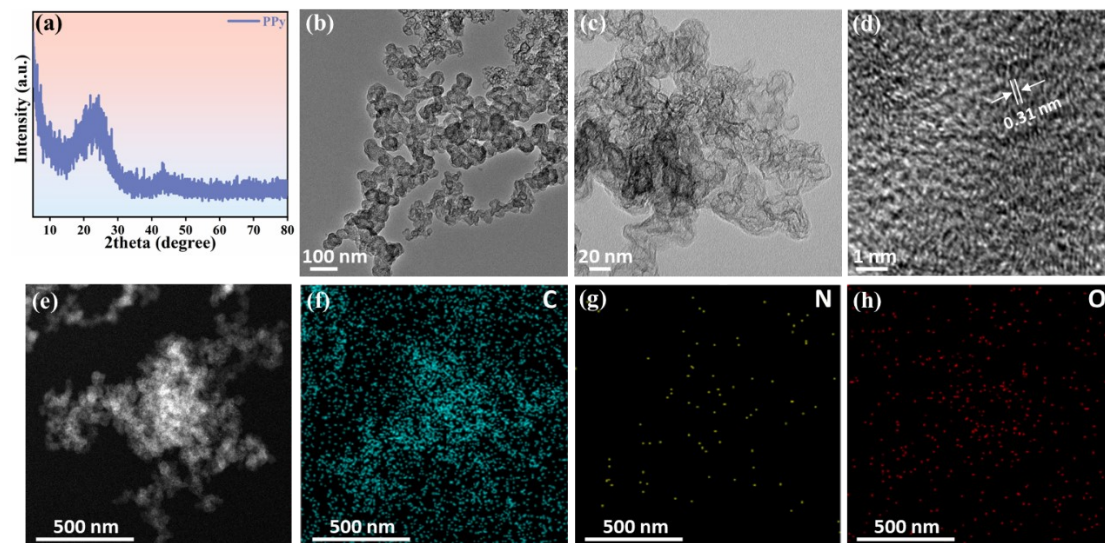

**Figure S21.** (a) XRD pattern, (b-c) TEM images, (d) HRTEM image, and (e-f) HAAD-STEM elemental mappings of pristine PPy.

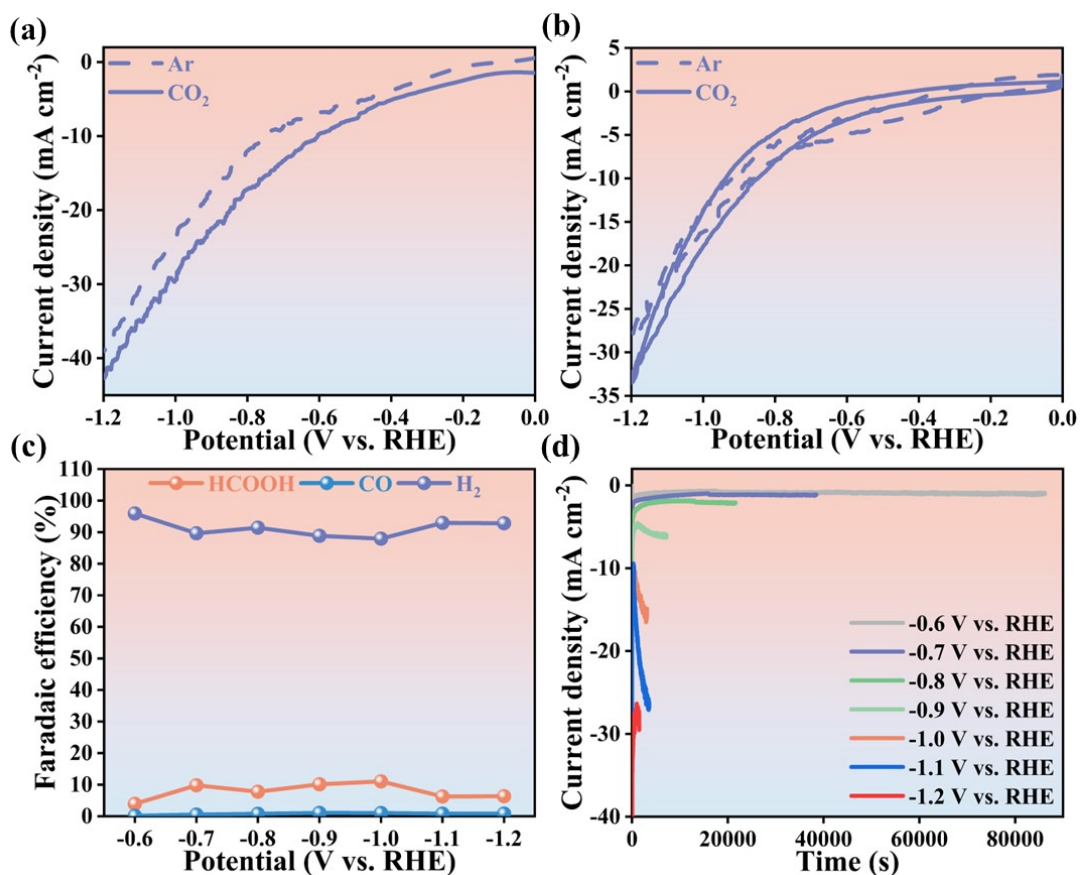

**Figure S22.** The electrochemical performance of PPy. (a) LSV plots, (b) CV curves in 0.5 M KHCO<sub>3</sub> under CO<sub>2</sub> or Ar, (c) FE of reduction products at various potentials, and (d) Chronoamperometry curves at various potentials in CO<sub>2</sub>-saturated 0.5 M KHCO<sub>3</sub>.

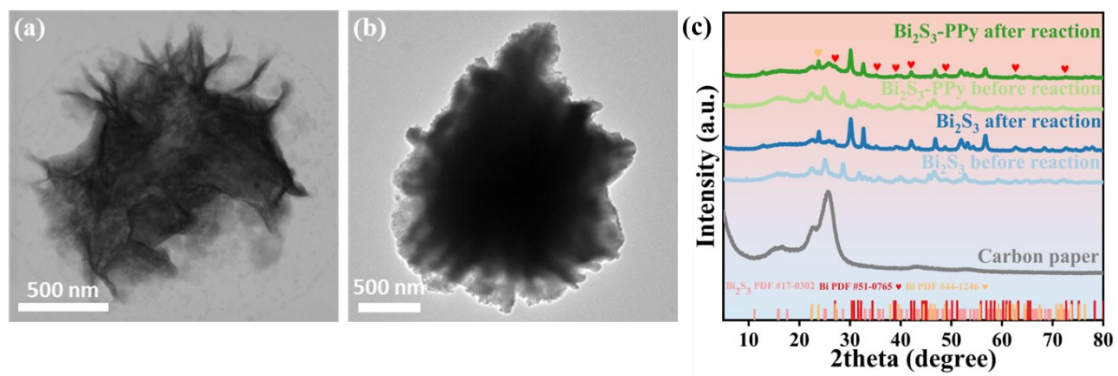

**Figure S23.** (a-b) TEM images of Bi<sub>2</sub>S<sub>3</sub>-PPy after CO<sub>2</sub>RR measurement. (c) The XRD patterns of Bi<sub>2</sub>S<sub>3</sub>-PPy and Bi<sub>2</sub>S<sub>3</sub> before and after the CO<sub>2</sub>RR long-term stability test.



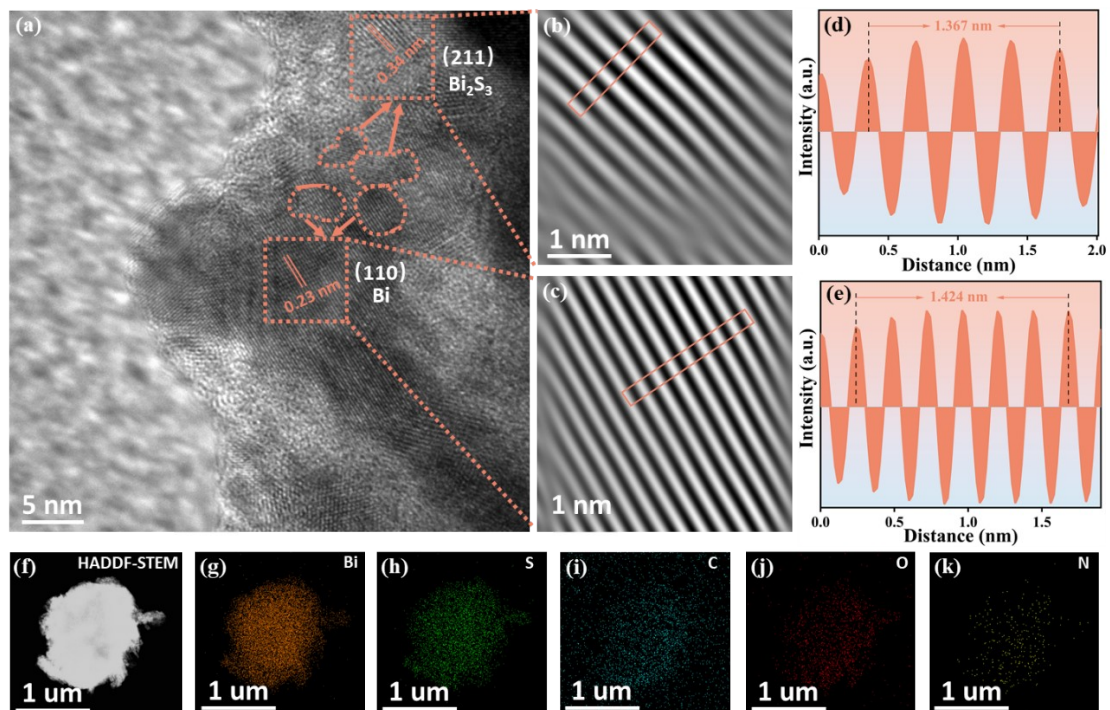

**Figure S24.** (a-c) HRTEM image, (d-e) Intensity profiles of the lattice fringe corresponding to the orange range. (f) HAADF-STEM image and EDX elemental mappings of  $\text{Bi}_2\text{S}_3$ -PPy composite after  $\text{CO}_2\text{RR}$  long-term stability test.

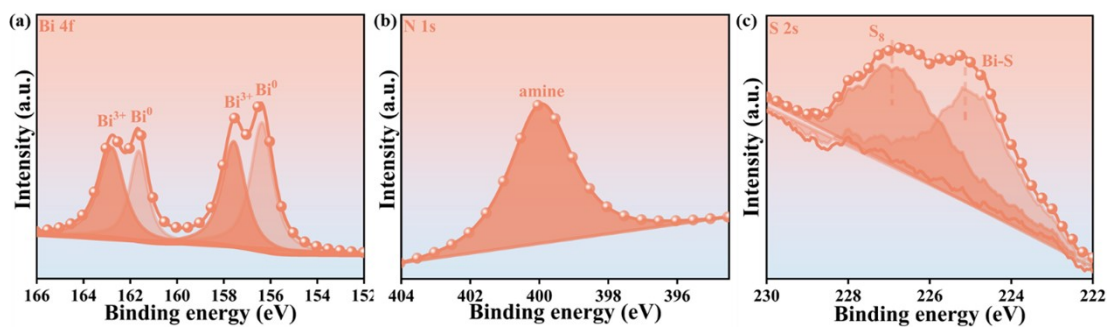

**Figure S25.** High-resolution (a) Bi 4f, (b) N 1s, (c) S 2s XPS spectra of  $\text{Bi}_2\text{S}_3\text{-PPy}$  composite after  $\text{CO}_2\text{RR}$  long-term stability test.

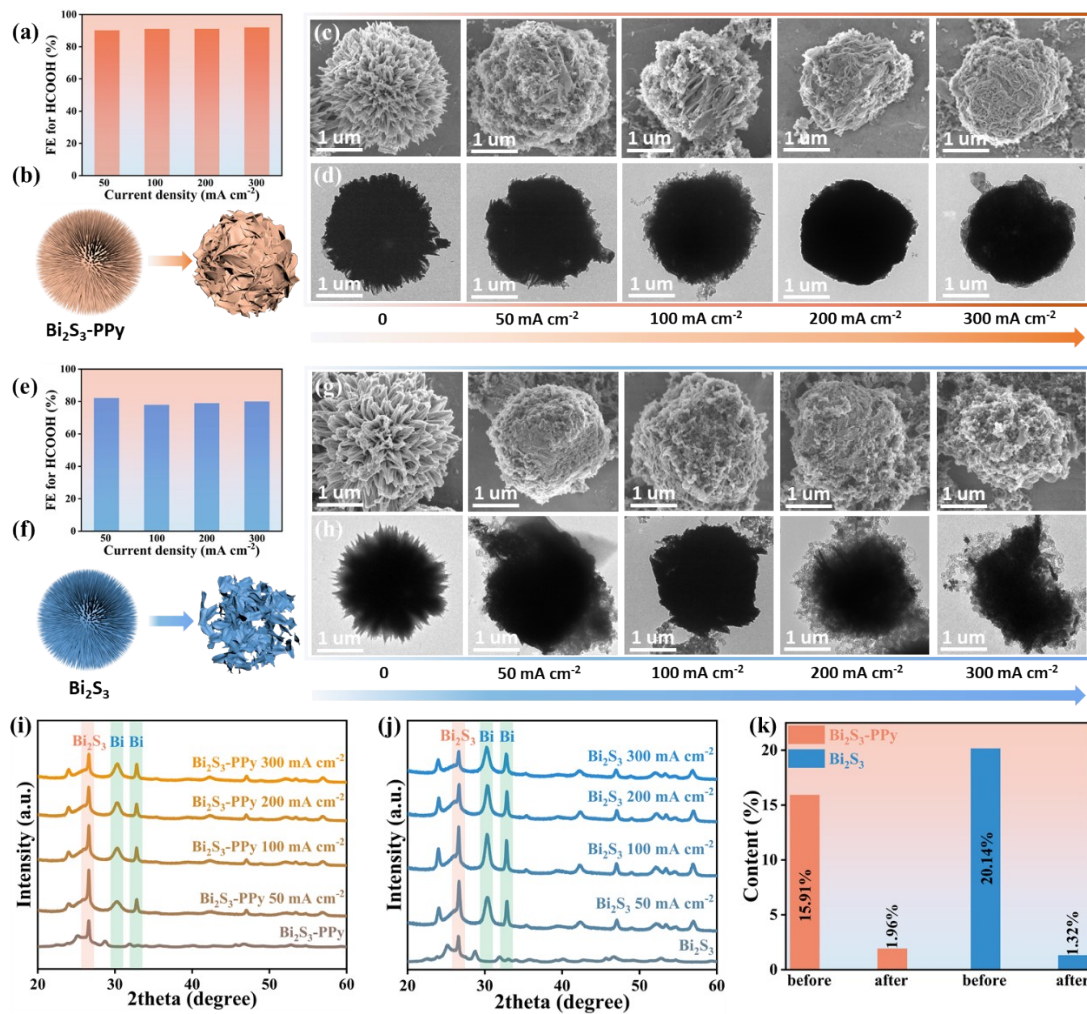

**Figure S26.** (a, e) FE for formate of Bi<sub>2</sub>S<sub>3</sub>-PPy and Bi<sub>2</sub>S<sub>3</sub> under different current densities, (b, f) schematic illustration of conversion process under large current density, (c, g) SEM images, (d, h) TEM images and (i, j) XRD patterns and (k) the content of S by XPS under a different current density of Bi<sub>2</sub>S<sub>3</sub>-PPy and Bi<sub>2</sub>S<sub>3</sub> before and after CO<sub>2</sub>RR under 1 M KOH for 1800 s.

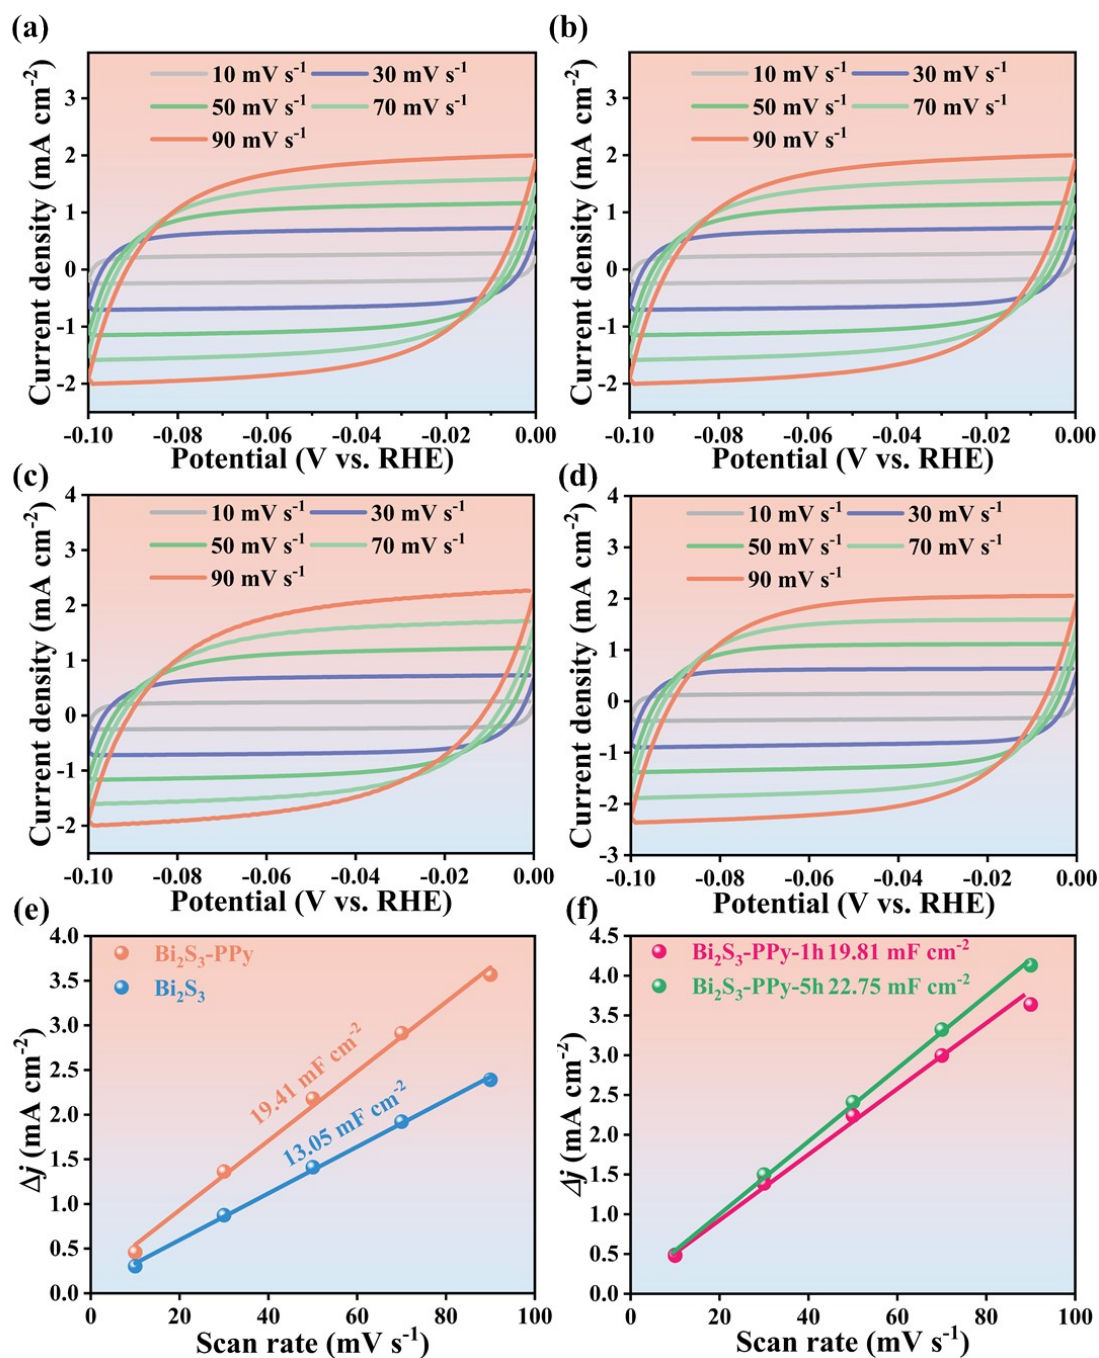

**Figure S27.** Cyclic voltammograms at the range of -0.1 to 0 V vs. RHE with different scan rates (10, 30, 50, 70, 90 mV s<sup>-1</sup>) for (a) pristine Bi<sub>2</sub>S<sub>3</sub>, (b) Bi<sub>2</sub>S<sub>3</sub>-PPy, (c) Bi<sub>2</sub>S<sub>3</sub>-PPy-1 h, and (d) Bi<sub>2</sub>S<sub>3</sub>-PPy-5 h. Charging current density differences plotted against scan rates over (e-f) Bi<sub>2</sub>S<sub>3</sub>, Bi<sub>2</sub>S<sub>3</sub>-PPy-1 h, Bi<sub>2</sub>S<sub>3</sub>-PPy, and (f) Bi<sub>2</sub>S<sub>3</sub>-PPy-5 h.

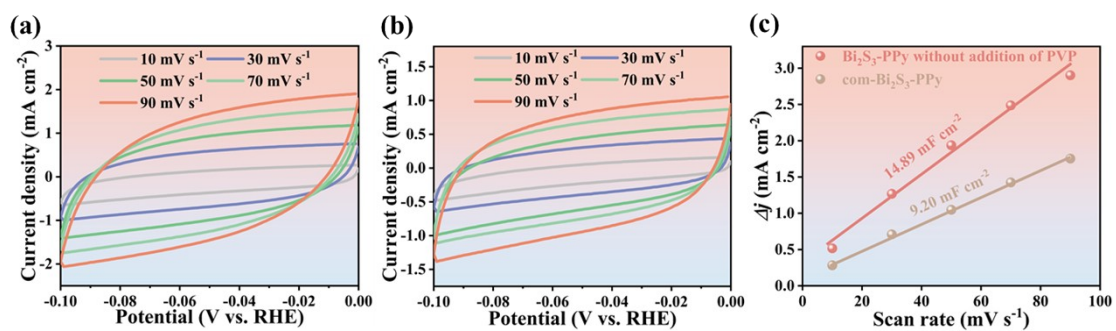

**Figure S28.** Cyclic voltammograms at the range of -0.1 to 0 V vs. RHE with different scan rates (10, 30, 50, 70, 90 mV s<sup>-1</sup>) for (a) Bi<sub>2</sub>S<sub>3</sub>-PPy without the addition of PVP, (b) com-Bi<sub>2</sub>S<sub>3</sub>-PPy. Charging current density differences plotted against scan rates over (c) Bi<sub>2</sub>S<sub>3</sub>-PPy without the addition of PVP and com-Bi<sub>2</sub>S<sub>3</sub>-PPy.

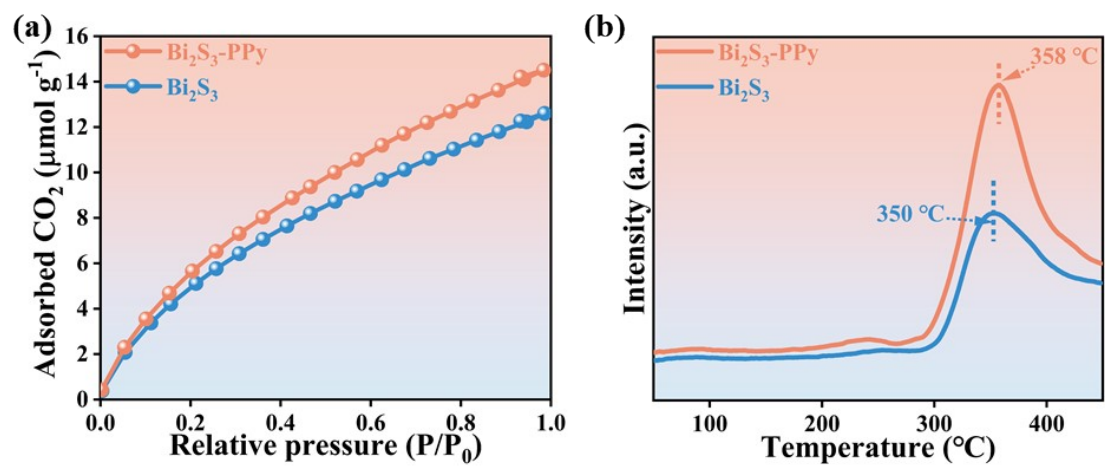

**Figure S29.** (a) CO<sub>2</sub> adsorption isotherms at 25 °C, (b) CO<sub>2</sub>-TPD spectra of Bi<sub>2</sub>S<sub>3</sub> and Bi<sub>2</sub>S<sub>3</sub>-PPy.

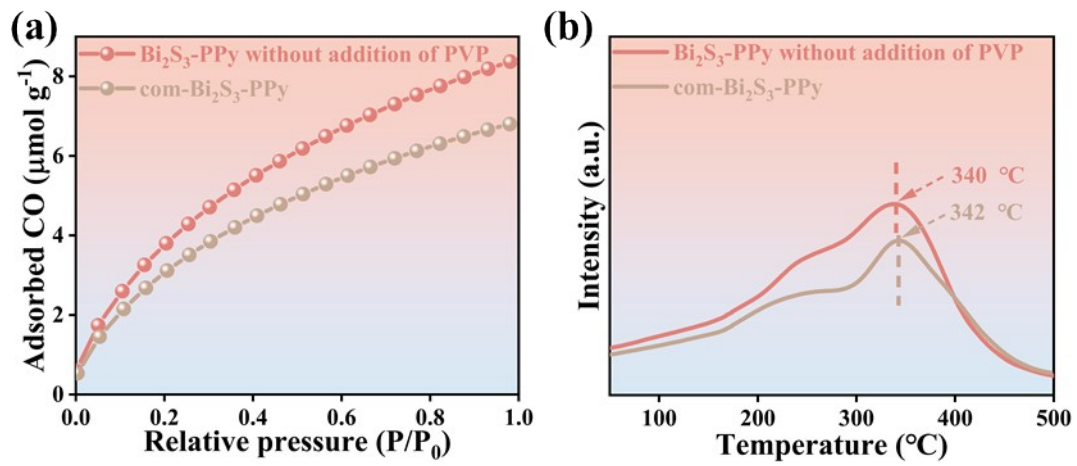

**Figure S30.** (a) CO<sub>2</sub> adsorption isotherms at 25 °C, (b) CO<sub>2</sub>-TPD spectra of Bi<sub>2</sub>S<sub>3</sub>-PPy without the addition of PVP and com-Bi<sub>2</sub>S<sub>3</sub>-PPy.

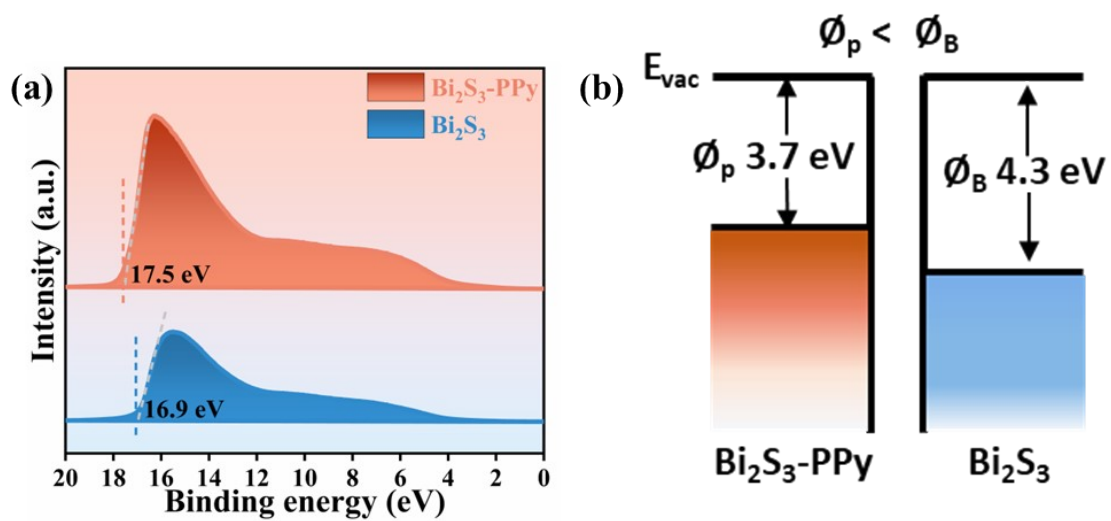

**Figure S31.** (a) UPS spectra and (b) work function values of  $\text{Bi}_2\text{S}_3\text{-PPy}$  and  $\text{Bi}_2\text{S}_3$ .



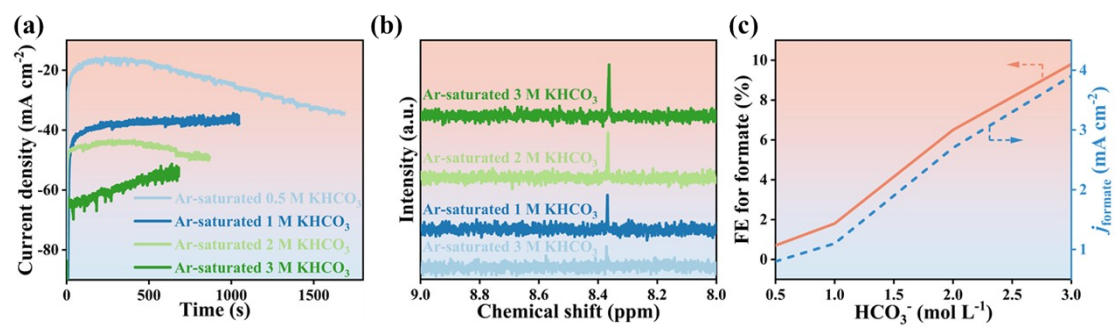

**Figure S32.** Electrocatalytic performance of Bi<sub>2</sub>S<sub>3</sub>-PPy in Ar-saturated KHCO<sub>3</sub> with different HCO<sub>3</sub><sup>-</sup> concentrations: (a) Chronoamperometric responses at the same 20 C; (b) The NMR spectra of the catholyte recycled after electrolysis; (c) FE<sub>formate</sub> and partial densities of formate.

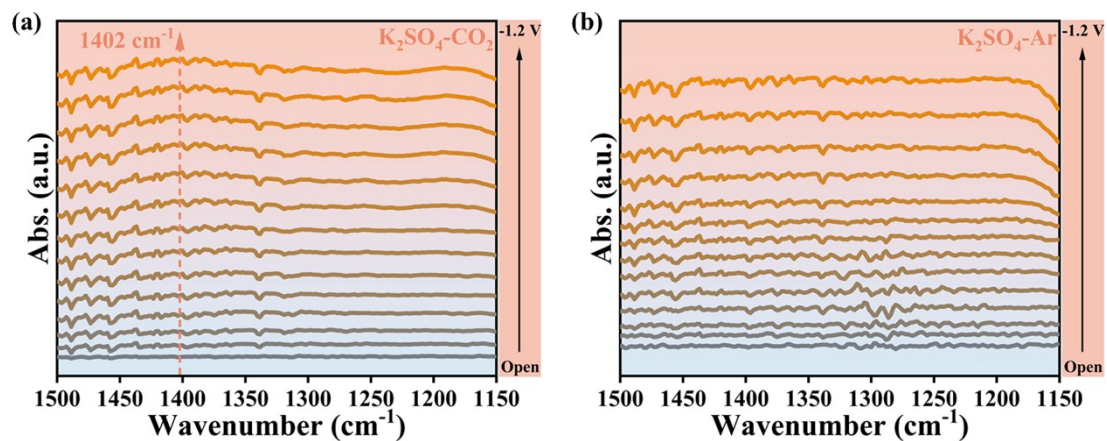

**Figure S33.** In-situ ATR-IR spectra of Bi<sub>2</sub>S<sub>3</sub>-PPy collected in (c) CO<sub>2</sub> and (d) Ar-saturated 0.2 M K<sub>2</sub>SO<sub>4</sub> under different applied potentials.

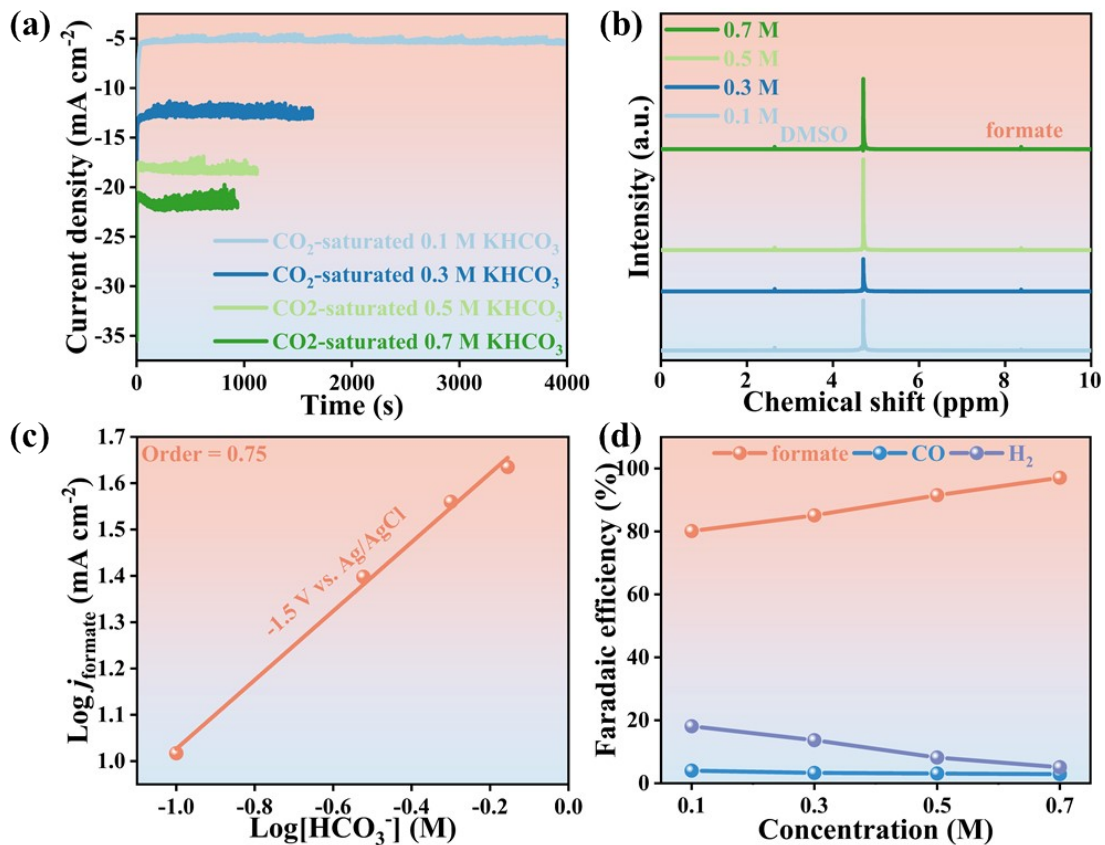

**Figure S34.** (a) *i-t* curves, (b) <sup>1</sup>H NMR spectra of the electrolyte for Bi<sub>2</sub>S<sub>3</sub>-PPy with different concentration CO<sub>2</sub>-saturated KHCO<sub>3</sub> solution. (c) the partial current density of formate plots against the HCO<sub>3</sub><sup>-</sup> concentration. (d) Faradaic efficiency of Bi<sub>2</sub>S<sub>3</sub>-PPy under different concentrations of CO<sub>2</sub>-saturated KHCO<sub>3</sub>.

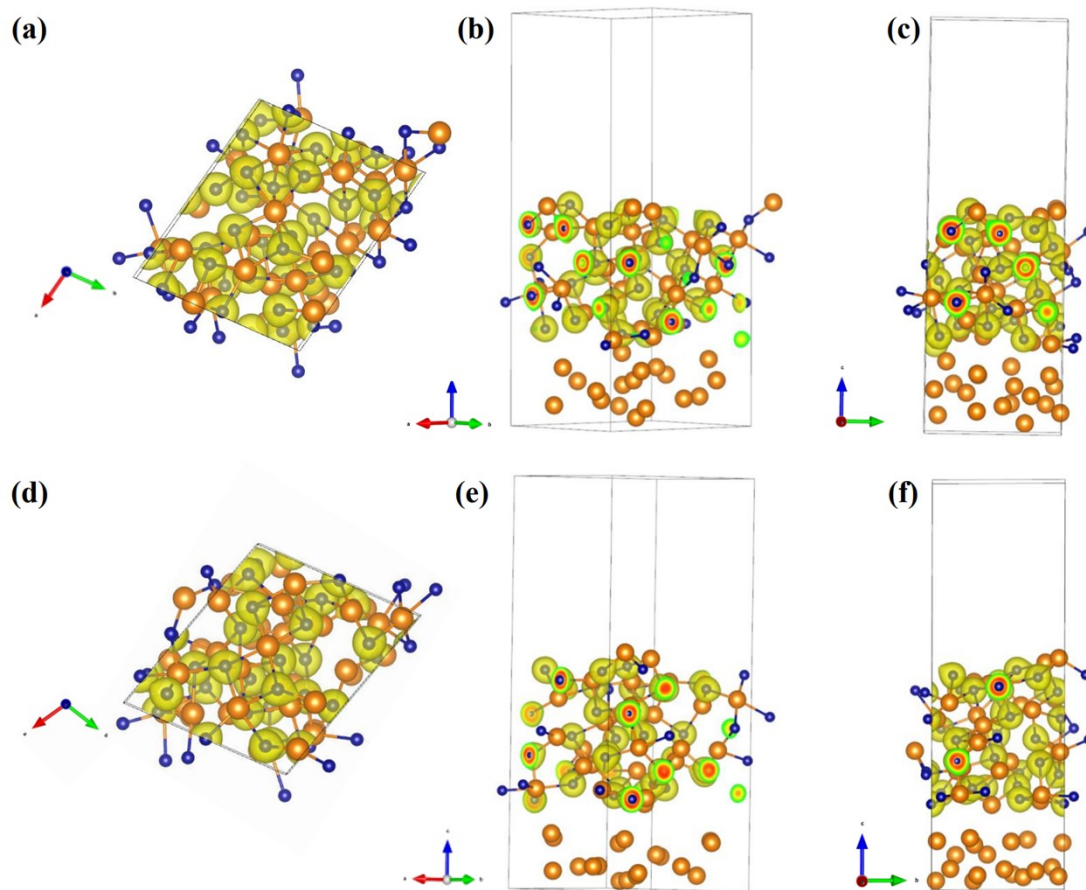

**Figure S35.** The partial charge density with top view, front view, and side view around the conduction band minimum of (a-c)  $\text{Bi}_2\text{S}_3$  slab with 2 S vacancies and (d-f)  $\text{Bi}_2\text{S}_3$ -PPy slab with 6 S vacancies, in which yellow refers to charge density contour with the value of  $0.0001 \text{ e/bohr}^3$ . S atoms (blue); Bi atoms (orange).

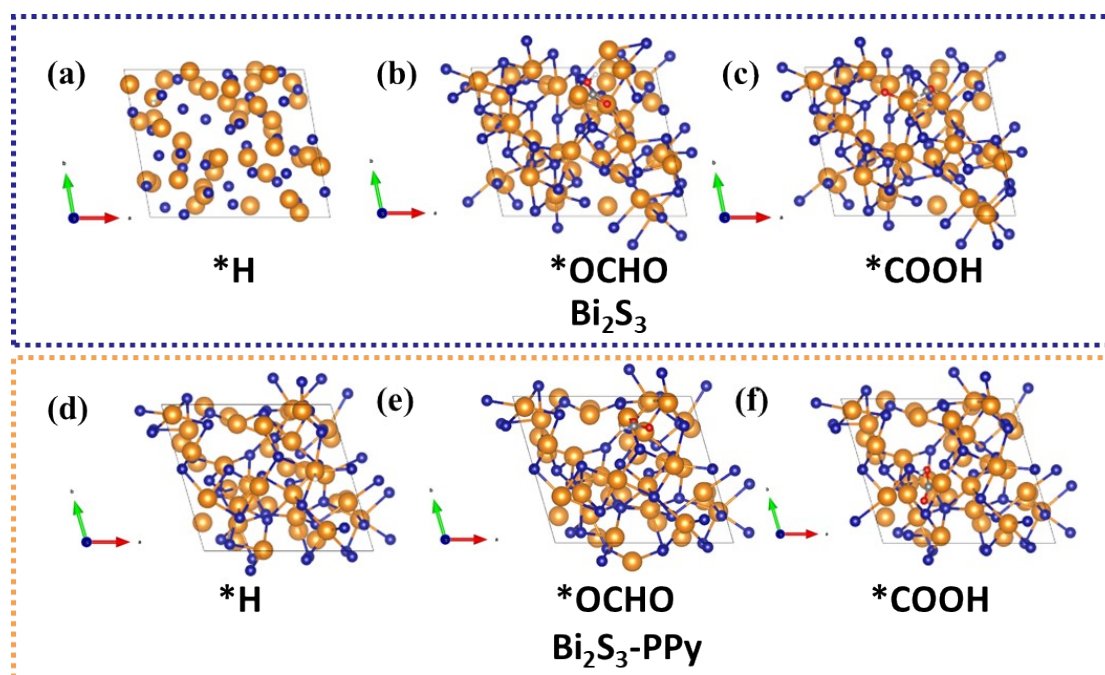

**Figure S36.** DFT calculation models of (a)  $\text{*H}$ , (b)  $\text{*OCHO}$ , and (c)  $\text{*COOH}$  adsorption on  $\text{Bi}_2\text{S}_3$  with 2 S vacancies and (d)  $\text{*H}$ , (e)  $\text{*OCHO}$ , and (f)  $\text{*COOH}$  adsorption on  $\text{Bi}_2\text{S}_3\text{-PPy}$  with 6 S vacancies. Bi, orange; S, blue; C, grey; O, red; H, white.

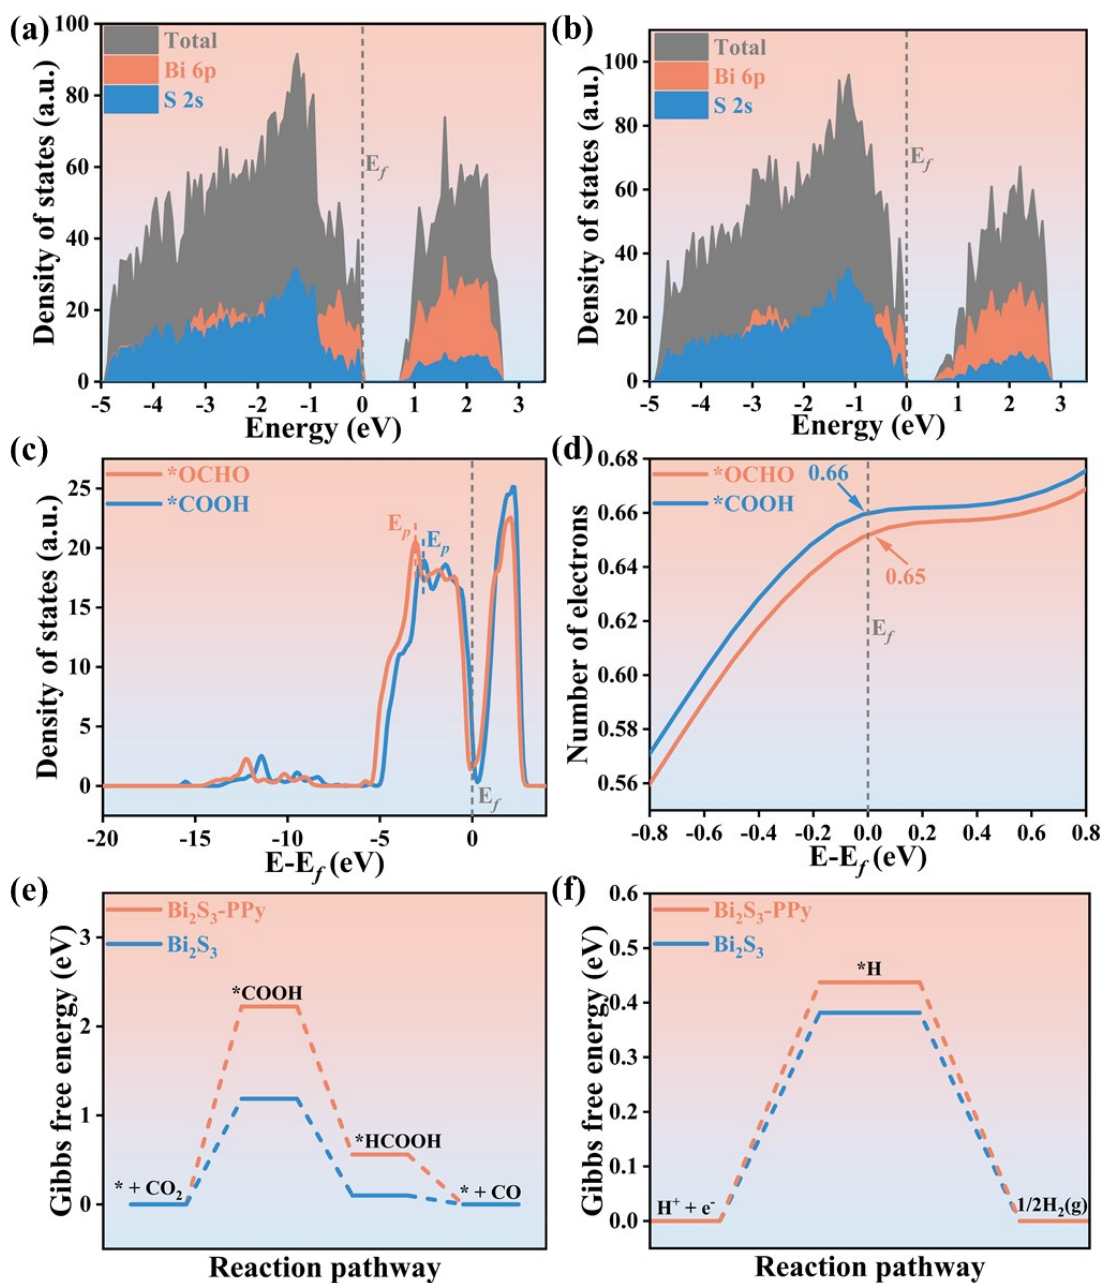

**Figure S37.** The calculated density of state (DOS) for (a) Bi<sub>2</sub>S<sub>3</sub>-PPy slab with 6 S vacancies and (b) Bi<sub>2</sub>S<sub>3</sub> slab with 2 S vacancies. (c) DOS of the Bi p orbital in Bi<sub>2</sub>S<sub>3</sub> with \*OCHO and \*COOH adsorbed. (d) The corresponding number of electrons in the p orbital per Bi atom with \*OCHO and \*COOH adsorbed. Calculated reaction energy profiles for (e) CO and (f) H<sub>2</sub> formation on Bi<sub>2</sub>S<sub>3</sub> and Bi<sub>2</sub>S<sub>3</sub>-PPy.

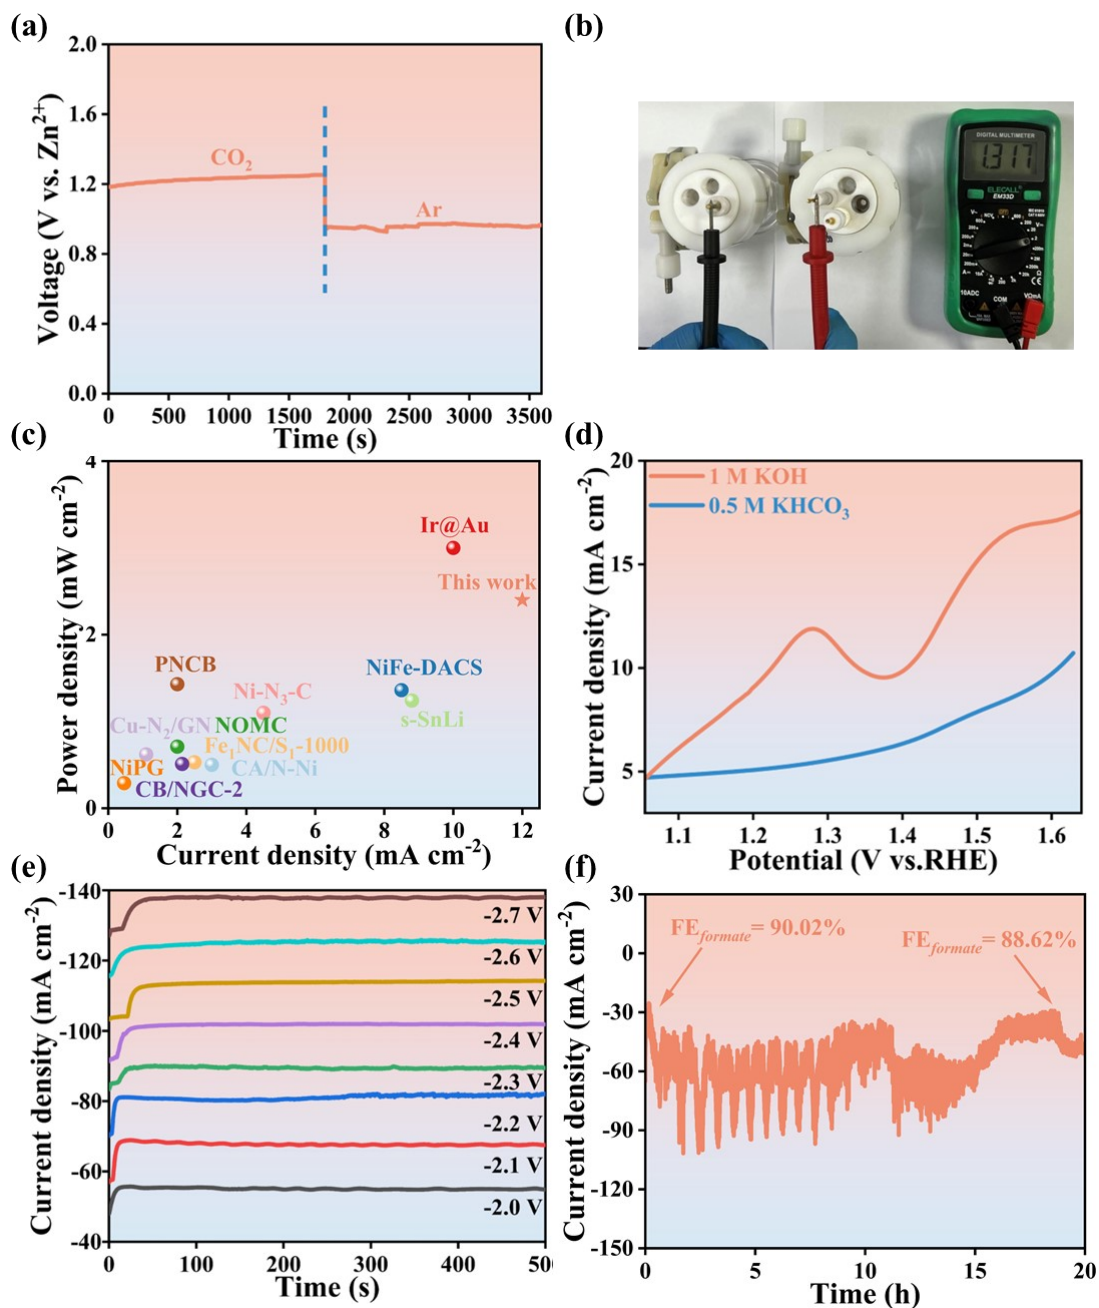

**Figure S38.** (a) The OCP curve of Bi<sub>2</sub>S<sub>3</sub>-PPy-based Zn-CO<sub>2</sub> batteries. (b) Digital image of the assembled Zn-CO<sub>2</sub> battery exhibiting a maximum open-circuit voltage of 1.3 V measured using a voltmeter. (c) Comparison of power densities towards non-precious metal-based Zn-CO<sub>2</sub> batteries. (d) The LSV curves of commercial RuO<sub>2</sub> in different electrolytes. (e) The *i*-*t* curves for combined CO<sub>2</sub>RR and OER in an H-Cell configuration. (f) The stability test of Bi<sub>2</sub>S<sub>3</sub>-PPy for combining CO<sub>2</sub>RR and OER.

**Table S1.** The interaction energy of pyrrole and PPy with sulfide.

| Form                                | Interaction Energy (eV) |
|-------------------------------------|-------------------------|
| Bi <sub>2</sub> S <sub>3</sub> -Py  | -1.125                  |
| Bi <sub>2</sub> S <sub>3</sub> -PPy | -0.530                  |



**Table S2.** Comparison of the electrocatalytic activity of our catalyst with other state-of-the-art catalysts reported recently for electrochemical reduction of CO<sub>2</sub> to formate in aqueous media.

| <b>Electrocatalysts</b>                                      | <b>Overpotential<br/>(V)</b> | <b>Formate FE<br/>(%)</b> | <b>Formate current<br/>density (mA cm<sup>-2</sup>)</b> | <b>References</b> |
|--------------------------------------------------------------|------------------------------|---------------------------|---------------------------------------------------------|-------------------|
| In <sub>2</sub> O <sub>3</sub> -rGO                          | 1.00                         | 84.6                      | 22.2                                                    | 5                 |
| Ultra Small<br>SnO                                           | 0.67                         | 75.0                      | 20.4                                                    | 6                 |
| Ag <sub>3</sub> Sn NPs                                       | 0.80                         | 80.0                      | 15.6                                                    | 7                 |
| Sub-2 nm SnO <sub>2</sub><br>Quantum<br>Wires                | 0.96                         | 87.3                      | 13.7                                                    | 8                 |
| Ag-Bi-S-O<br>Decorated Bi<br>Nanocrystals                    | 0.70                         | 94.3                      | 12.5                                                    | 9                 |
| Sn-graphene                                                  | 0.96                         | 89.0                      | 18.8                                                    | 10                |
| Partially<br>oxidized Co<br>atomic layer                     | 0.16                         | 90.1                      | 9.6                                                     | 11                |
| Bi <sub>2</sub> O <sub>3</sub><br>NSs@MCCM                   | 1.06                         | 93.8                      | 15.2                                                    | 12                |
| BiO <sub>x</sub> /C                                          | 0.92                         | 93.4                      | 16.1                                                    | 13                |
| Cu<br>foam@BiNW                                              | 0.69                         | 95.0                      | 15.0                                                    | 14                |
| Bi <sub>2</sub> O <sub>3</sub> -NGQDs                        | 0.70                         | 97.6                      | 18.1                                                    | 15                |
| Bi dendrite                                                  | 0.54                         | 89.0                      | 2.7                                                     | 16                |
| Bi <sub>2</sub> O <sub>2</sub> CO <sub>3</sub><br>nanosheets | 0.70                         | 85.0                      | 9.4                                                     | 17                |
| SnO <sub>2</sub><br>Nanosheets on<br>carbon cloth            | 0.88                         | 87.0                      | 45.0                                                    | 18                |
| Sn-pNMs                                                      | 0.60                         | 80.0                      | 0.8                                                     | 19                |
| Nanostructured                                               | 1.07                         | 93.6                      | 9.6                                                     | 20                |

|                                        |            |              |           |                  |
|----------------------------------------|------------|--------------|-----------|------------------|
| SnO <sub>2</sub>                       |            |              |           |                  |
| Sn-CF 1000                             | 0.60       | 63.0         | 11.0      | 21               |
| Dendritic                              | 0.6        | 62.0         | 0.7       | 22               |
| Cu <sub>0.2</sub> In <sub>0.8</sub>    |            |              |           |                  |
| PEI-NCNT                               | 1.07       | 87.0         | 8.3       | 23               |
| <b>Bi<sub>2</sub>S<sub>3</sub>-PPy</b> | <b>0.9</b> | <b>91.18</b> | <b>15</b> | <b>This work</b> |

---

**Table S3.** Comparison of the electrocatalytic activity of our catalyst with other state-of-the-art catalysts reported recently for electrochemical reduction of CO<sub>2</sub> to formate in aqueous media.

| Electrocatalysts                                               | Overpotential<br>(V) | Formate FE<br>(%) | Formate current<br>density (mA cm <sup>-2</sup> ) | References       |
|----------------------------------------------------------------|----------------------|-------------------|---------------------------------------------------|------------------|
| Bi@Sn                                                          | -                    | 92.2              | -230.5                                            | 24               |
| Bi <sub>2</sub> O <sub>3</sub> NT                              | 0.58                 | 95                | -119.5                                            | 25               |
| N-Sn(S)                                                        | 0.80                 | 93.3              | -21                                               | 26               |
| SnO <sub>2</sub> NP                                            | 1.21                 | 92.8              | -64                                               | 27               |
| Bi-ene                                                         | -                    | 99.6              | -100                                              | 28               |
| BiOBr                                                          | -                    | 90                | -180                                              | 29               |
| Bi-NSs                                                         | 1.51                 | 86.9              | -373                                              | 30               |
| S-BiVO <sub>4</sub>                                            | 1.00                 | 97.4              | -105.4                                            | 31               |
| ZnIn <sub>2</sub> S <sub>4</sub>                               | -                    | 99.3              | -297.8                                            | 32               |
| Bi <sub>2</sub> S <sub>3</sub> -Bi <sub>2</sub> O <sub>3</sub> | -                    | 90                | -200                                              | 33               |
| PD-Bi                                                          | -                    | 90.7              | -200                                              | 34               |
| Pb <sub>1</sub> Cu                                             | -                    | 92                | -1000                                             | 35               |
| s-LiSn                                                         | -                    | 94                | -1000                                             | 36               |
| AI5S8                                                          | -                    | 94                | -560                                              | 37               |
| BOC                                                            | -                    | 87                | -230                                              | 38               |
| Bi NRs                                                         | -                    | 95                | -200                                              | 39               |
| Bi-NBs                                                         | -                    | 95                | -330                                              | 40               |
| <b>Bi<sub>2</sub>S<sub>3</sub>-PPy</b>                         | <b>0.78</b>          | <b>98%</b>        | <b>-250</b>                                       | <b>This work</b> |
|                                                                | <b>0.98</b>          | <b>92%</b>        | <b>-300</b>                                       | <b>This work</b> |

**Table S4.** Free energy of \*OCHO, \*COOH, \*CO, \*H absorption, and  $E_p$  on various DFT models.

| Free energy (eV) | Bi <sub>2</sub> S <sub>3</sub> | Bi <sub>2</sub> S <sub>3</sub> -PPy |
|------------------|--------------------------------|-------------------------------------|
| *OCHO            | 0.534                          | 0.1777                              |
| *COOH            | 1.186                          | 2.223                               |
| *CO              | 0.1                            | 0.56                                |
| *H               | 0.3815                         | 0.4373                              |
| $E_p$            | -3.07                          | -0.81                               |

**Table S5.** The performance comparison of Zn-CO<sub>2</sub> batteries.

| Catalysts                                   | FE <sub>CO</sub>       | Power density<br>(mW cm <sup>-2</sup> ) | Current density<br>(mA cm <sup>-2</sup> ) | Reference        |
|---------------------------------------------|------------------------|-----------------------------------------|-------------------------------------------|------------------|
| CA/N-Ni                                     | 98                     | 0.5                                     | 3                                         | 41               |
| NiFe-DASC                                   | 90.6                   | 1.36                                    | 8.5                                       | 42               |
| s-SnLi                                      | -                      | 1.24                                    | 8.8                                       | 43               |
| NOMC                                        | 76                     | 0.71                                    | 2                                         | 44               |
| Ni-N <sub>3</sub> -C                        | 93                     | 1.1                                     | 4.5                                       | 45               |
| Ir@Au                                       | 90                     | 3                                       | 10                                        | 46               |
| Fe <sub>1</sub> NC/S <sub>1</sub> -<br>1000 | -                      | 0.53                                    | 2.5                                       | 47               |
| NiPG                                        | 66                     | 0.29                                    | 0.46                                      | 48               |
| Cu-N <sub>2</sub> /GN                       | 64                     | 0.62                                    | 1.1                                       | 49               |
| CB-NGC-2                                    | 80.4                   | 0.51                                    | 2.14                                      | 50               |
| PNCB                                        | 11                     | 1.43                                    | 2                                         | 51               |
| <b>Bi<sub>2</sub>S<sub>3</sub>-PPy</b>      | <b>93</b><br>(formate) | <b>2.4</b>                              | <b>12</b>                                 | <b>This work</b> |

**Table S6.** The property comparison towards various catalysts for CO<sub>2</sub>-OER electrolysis.

| Cathode                                | Catholyte                         | Anode                            | Anolyte                           | Voltage (V)<br>at 10 mA<br>cm <sup>-2</sup> | Reference        |
|----------------------------------------|-----------------------------------|----------------------------------|-----------------------------------|---------------------------------------------|------------------|
| SiNC                                   | 1 M KCO <sub>3</sub>              | SiNC                             | 1 M KOH                           | >2.5                                        | 52               |
| CoPc-CNT                               | 2 M KHCO <sub>3</sub>             | NiFe-HC                          | 2 M KHCO <sub>3</sub>             | ~2.21                                       | 53               |
| Co <sub>2</sub> FeO <sub>4</sub>       | 0.5 M<br>KHCO <sub>3</sub>        | Co <sub>2</sub> FeO <sub>4</sub> | 1.0 M KOH                         | ~2.25                                       | 54               |
| Mp-SnO <sub>2</sub>                    | 0.5 M<br>NaHCO <sub>3</sub>       | IrO <sub>2</sub>                 | 0.5 M<br>NaHCO <sub>3</sub>       | >3                                          | 55               |
| Bi(B)-2                                | 0.5 M<br>KHCO <sub>3</sub>        | FeP NS/NF                        | 0.5 M<br>KHCO <sub>3</sub>        | ~2.48                                       | 56               |
| Bi-ene                                 | 0.5 M<br>KHCO <sub>3</sub>        | RuO <sub>2</sub>                 | 1.0 M KOH                         | 2.38                                        | 57               |
| Bi <sub>2</sub> O <sub>3</sub>         | 0.5 M<br>KHCO <sub>3</sub>        | Pt wire                          | 1.0 M KOH                         | >3                                          | 58               |
| BiNS                                   | 0.5 M<br>NaHCO <sub>3</sub>       | Ir/C                             | 0.5 M<br>NaHCO <sub>3</sub>       | 3.2                                         | 59               |
| PNCB                                   | 0.5 M<br>KHCO <sub>3</sub>        | Ir/C                             | 0.5 M<br>NaHCO <sub>3</sub>       | 2.71                                        | 51               |
| <b>Bi<sub>2</sub>S<sub>3</sub>-PPy</b> | <b>0.5 M<br/>KHCO<sub>3</sub></b> | <b>RuO<sub>2</sub></b>           | <b>0.5 M<br/>KHCO<sub>3</sub></b> | <b>2.18</b>                                 | <b>This work</b> |
| <b>Bi<sub>2</sub>S<sub>3</sub>-PPy</b> | <b>0.5 M<br/>KHCO<sub>3</sub></b> | <b>RuO<sub>2</sub></b>           | <b>1.0 M<br/>KOH</b>              | <b>2.05</b>                                 | <b>This work</b> |

## References

1. G. Kresse and D. Joubert, *Phys. Rev. B*, 1999, **59**, 1758-1775.
2. J. P. Perdew, K. Burke and M. Ernzerhof, *Phys. Rev. Lett.*, 1996, **77**, 3865-3868.
3. S. Grimme, J. Antony, S. Ehrlich and H. Krieg, *J. Chem. Phys.* 2010, **132**, 154104.
4. C.-C. He, J.-H. Liao, S.-B. Qiu, Y.-J. Zhao and X.-B. Yang, *Comput. Mater. Sci.*, 2021, **193**, 110386.
5. Z. Zhang, F. Ahmad, W. Zhao, W. Yan, W. Zhang, H. Huang, C. Ma and J. Zeng, *Nano Lett.*, 2019, **19**, 4029-4034.
6. J. Gu, F. Héroguel, J. Luterbacher and X. Hu, *Science*, 2018, **57**, 2943-2947.
7. W. Luc, C. Collins, S. Wang, H. Xin, K. He, Y. Kang and F. Jiao, *J. Am. Chem. Soc.*, 2017, **139**, 1885-1893.
8. S. Liu, J. Xiao, X. F. Lu, J. Wang, X. Wang and X. W. Lou, *Angew. Chem., Int. Ed.*, 2019, **58**, 8499-8503.
9. J.-H. Zhou, K. Yuan, L. Zhou, Y. Guo, M.-Y. Luo, X.-Y. Guo, Q.-Y. Meng and Y.-W. Zhang, *Angew. Chem., Int. Ed.*, 2019, **58**, 14197-14201.
10. F. Lei, W. Liu, Y. Sun, J. Xu, K. Liu, L. Liang, T. Yao, B. Pan, S. Wei and Y. Xie, *Nat. Commun.*, 2016, **7**, 12697.
11. S. Gao, Y. Lin, X. Jiao, Y. Sun, Q. Luo, W. Zhang, D. Li, J. Yang and Y. Xie, *Nature*, 2016, **529**, 68-71.
12. S. Liu, X. F. Lu, J. Xiao, X. Wang and X. W. D. Lou, *Angew. Chem., Int. Ed.*, 2019, **58**, 13828-13833.
13. C. W. Lee, J. S. Hong, K. D. Yang, K. Jin, J. H. Lee, H.-Y. Ahn, H. Seo, N.-E. Sung and K. T. Nam, *ACS Cataly.*, 2018, **8**, 931-937.
14. X. Zhang, X. Sun, S.-X. Guo, A. M. Bond and J. Zhang, *Energy Environ. Sci.*, 2019, **12**, 1334-1340.
15. Z. Chen, K. Mou, X. Wang and L. Liu, *C, Angew. Chem., Int. Ed.*, 2018, **57**, 12790-12794.
16. J. H. Koh, D. H. Won, T. Eom, N.-K. Kim, K. D. Jung, H. Kim, Y. J. Hwang and B. K. Min, *ACS Cataly.*, 2017, **7**, 5071-5077.
17. Y. Zhang, X. Zhang, Y. Ling, F. Li, A. M. Bond and J. Zhang, *Energy Environ. Sci.*, 2018, **57**, 13283-13287.
18. F. Li, L. Chen, G. P. Knowles, D. R. MacFarlane and J. Zhang, *Angew. Chem., Int. Ed.*, 2017, **56**, 505-509.
19. B. Kumar, V. Atla, J. P. Brian, S. Kumari, T. Q. Nguyen, M. Sunkara and J. M. Spurgeon, *Angew. Chem., Int. Ed.*, 2017, **56**, 3645-3649.
20. S. Zhang, P. Kang and T. J. Meyer, *J. Am. Chem. Soc.*, 2014, **136**, 1734-1737.
21. Y. Zhao, J. Liang, C. Wang, J. Ma and G. G. Wallace, *Adv. Energy Mater.*, 2018, **8**, 1702524.
22. Z. B. Hoffman, T. S. Gray, K. B. Moraveck, T. B. Gunnoe and G. Zangari, *ACS Cataly.*, 2017, **7**, 5381-5390.
23. S. Zhang, P. Kang, S. Ubnoske, M. K. Brennaman, N. Song, R. L. House, J. T. Glass and T. J. Meyer, *J. Am. Chem. Soc.*, 2014, **136**, 7845-7848.

24. Y. Xing, X. Kong, X. Guo, Y. Liu, Q. Li, Y. Zhang, Y. Sheng, X. Yang, Z. Geng and J. Zeng, *Adv. Sci.*, 2020, **7**, 1902989.
25. Q. Gong, P. Ding, M. Xu, X. Zhu, M. Wang, J. Deng, Q. Ma, N. Han, Y. Zhu, J. Lu, Z. Feng, Y. Li, W. Zhou and Y. Li, *Nat. Commun.*, 2019, **10**, 2807.
26. H. Cheng, S. Liu, J. Zhang, T. Zhou, N. Zhang, X.-s. Zheng, W. Chu, Z. Hu, C. Wu and Y. Xie, *Nano Lett.*, 2020, **20**, 6097-6103.
27. C. Liang, B. Kim, S. Yang, L. Yang, C. Francisco Woellner, Z. Li, R. Vajtai, W. Yang, J. Wu, P. J. A. Kenis and Pulickel M. Ajayan, *J. Mater. Chem. A*, 2018, **6**, 10313-10319.
28. C. Cao, D.-D. Ma, J.-F. Gu, X. Xie, G. Zeng, X. Li, S.-G. Han, Q.-L. Zhu, X.-T. Wu and Q. Xu, *Angew. Chem., Int. Ed.*, 2020, **59**, 15014-15020.
29. F. P. García de Arquer, O. S. Bushuyev, P. De Luna, C.-T. Dinh, A. Seifitokaldani, M. I. Saidaminov, C.-S. Tan, L. N. Quan, A. Proppe, M. G. Kibria, S. O. Kelley, D. Sinton and E. H. Sargent, *Adv. Mater.*, 2018, **30**, 1802858.
30. J. Yang, X. Wang, Y. Qu, X. Wang, H. Huo, Q. Fan, J. Wang, L.-M. Yang and Y. Wu, *Adv. Energy Mater.*, 2020, **10**, 2001709.
31. W. Ma, J. Bu, Z. Liu, C. Yan, Y. Yao, N. Chang, H. Zhang, T. Wang and J. Zhang, *Adv. Funct. Mater.*, 2021, **31**, 2006704.
32. L.-P. Chi, Z.-Z. Niu, X.-L. Zhang, P.-P. Yang, J. Liao, F.-Y. Gao, Z.-Z. Wu, K.-B. Tang and M.-R. Gao, *Nat. Commun.*, 2021, **12**, 5835.
33. P. F. Sui, C. Xu, M. N. Zhu, S. Liu, Q. Liu and J. L. Luo, *Small*, 2022, **18**, e2105682.
34. Y. Wang, Y. Li, J. Liu, C. Dong, C. Xiao, L. Cheng, H. Jiang, H. Jiang and C. Li, *Angew. Chem., Int. Ed.*, 2021, **60**, 7681-7685.
35. T. Zheng, C. Liu, C. Guo, M. Zhang, X. Li, Q. Jiang, W. Xue, H. Li, A. Li, C.-W. Pao, J. Xiao, C. Xia and J. Zeng, *Nat. Nanotechnol.*, 2021, **16**, 1386-1393.
36. S. Yan, C. Peng, C. Yang, Y. Chen, J. Zhang, A. Guan, X. Lv, H. Wang, Z. Wang, T.-K. Sham, Q. Han and G. Zheng, *Angew. Chem., Int. Ed.*, 2021, **60**, 25741-25745.
37. J. Zhang, T. Fan, P. Huang, X. Lian, Y. Guo, Z. Chen and X. Yi, *Adv. Funct. Mater.*, 2022, **32**, 2113075.
38. P. F. Sui, M. R. Gao, S. Liu, C. Xu, M. N. Zhu and J. L. Luo, *Adv. Funct. Mater.*, 2022, **32**, 2203647.
39. Y. Li, J. Chen, S. Chen, X. Liao, T. Zhao, F. Cheng and H. Wang, *ACS Energy Lett.*, 2022, **7**, 1454-1461.
40. G. Zeng, Y. He, D.-D. Ma, S. Luo, S. Zhou, C. Cao, X. Li, X.-T. Wu, H.-G. Liao and Q.-L. Zhu, *Adv. Funct. Mater.*, 2022, **32**, 2201125.
41. Y. Zhang, X. Wang, S. Zheng, B. Yang, Z. Li, J. Lu, Q. Zhang, N. M. Adli, L. Lei, G. Wu and Y. Hou, *Adv. Funct. Mater.*, 2021, **31**, 2104377.
42. Z. Zeng, L. Y. Gan, H. Bin Yang, X. Su, J. Gao, W. Liu, H. Matsumoto, J. Gong, J. Zhang, W. Cai, Z. Zhang, Y. Yan, B. Liu and P. Chen, *Nat. Commun.*, 2021, **12**, 4088.
43. S. Yan, C. Peng, C. Yang, Y. Chen, J. Zhang, A. Guan, X. Lv, H. Wang, Z. Wang, T.-K. Sham, Q. Han and G. Zheng, *Angew. Chem., Int. Ed.*, 2021, **60**, 25741-25745.
44. S. Gao, Y. Liu, Z. Xie, Y. Qiu, L. Zhuo, Y. Qin, J. Ren, S. Zhang, G. Hu, J. Luo and X. Liu, *Small Methods*, 2021, **5**, 2001039.
45. Y. Zhang, L. Jiao, W. Yang, C. Xie and H.-L. Jiang, *Angew. Chem., Int. Ed.*, 2021, **60**, 7607-7611.



46. X. Wang, J. Xie, M. A. Ghausi, J. Lv, Y. Huang, M. Wu, Y. Wang and J. Yao, *Adv. Mater.*, 2019, **31**, 1807807.
47. T. Wang, X. Sang, W. Zheng, B. Yang, S. Yao, C. Lei, Z. Li, Q. He, J. Lu, L. Lei, L. Dai and Y. Hou, *Adv. Mater.*, 2020, **32**, 2002430.
48. R. Yang, J. Xie, Q. Liu, Y. Huang, J. Lv, M. A. Ghausi, X. Wang, Z. Peng, M. Wu and Y. Wang, *J. Mater. Chem. A*, 2019, **7**, 2575-2580.
49. W. Zheng, J. Yang, H. Chen, Y. Hou, Q. Wang, M. Gu, F. He, Y. Xia, Z. Xia, Z. Li, B. Yang, L. Lei, C. Yuan, Q. He, M. Qiu and X. Feng, *Adv. Funct. Mater.*, 2020, **30**, 1907658.
50. X. Hao, X. An, A. M. Patil, P. Wang, X. Ma, X. Du, X. Hao, A. Abudula and G. Guan, *ACS Appl. Mater. Interfaces*, 2021, **13**, 3738-3747.
51. Y. Wang, L. Xu, L. Zhan, P. Yang, S. Tang, M. Liu, X. Zhao, Y. Xiong, Z. Chen and Y. Lei, *Nano Energy*, 2022, **92**, 106780.
52. M. A. Ghausi, J. Xie, Q. Li, X. Wang, R. Yang, M. Wu, Y. Wang and L. Dai, *Angew. Chem., Int. Ed.*, 2018, **57**, 13135-13139.
53. Y. Meng, X. Zhang, W.-H. Hung, J. He, Y.-S. Tsai, Y. Kuang, M. J. Kenney, J.-J. Shyue, Y. Liu, K. H. Stone, X. Zheng, S. L. Suib, M.-C. Lin, Y. Liang and H. Dai, *Proc. Natl. Acad. Sci. U. S. A.*, 2019, **116**, 23915-23922.
54. Y. Mi, Y. Qiu, Y. Liu, X. Peng, M. Hu, S. Zhao, H. Cao, L. Zhuo, H. Li, J. Ren, X. Liu and J. Luo, *Adv. Funct. Mater.*, 2020, **30**, 2003438.
55. N. Han, Y. Wang, J. Deng, J. Zhou, Y. Wu, H. Yang, P. Ding and Y. Li, *J. Mater. Chem. A*, 2019, **7**, 1267-1272.
56. X. Chen, H. Chen, W. Zhou, Q. Zhang, Z. Yang, Z. Li, F. Yang, D. Wang, J. Ye and L. Liu, *Small*, 2021, **17**, 2101128.
57. C. Cao, D.-D. Ma, J.-F. Gu, X. Xie, G. Zeng, X. Li, S.-G. Han, Q.-L. Zhu, X.-T. Wu and Q. Xu, *Angew. Chem., Int. Ed.*, 2020, **59**, 15014-15020.
58. S.-F. Leung, H.-C. Fu, M. Zhang, A. H. Hassan, T. Jiang, K. N. Salama, Z. L. Wang and J.-H. He, *Energy Environ. Sci.*, 2020, **13**, 1300-1308.
59. N. Han, Y. Wang, H. Yang, J. Deng, J. Wu, Y. Li and Y. Li, *Nat. Commun.*, 2018, **9**, 1320.
